# Supplementary material
Source: publisher figshare collection journal article supplement (https://acs.figshare.com/ndownloader/files/3991360)
Supplement: Supplementary file 1 [file 3991360]

# **Total Synthesis of Thaxtomin A and its Stereoisomers and Findings of their Biological Activities**

Hongbo Zhang,<sup>a,b</sup> Xin Ning,<sup>b</sup> Hang Hang,<sup>b</sup> Xuyan Ru,<sup>b</sup> Haichen Li,<sup>c</sup> Yonghong Li,<sup>a</sup>  
Lizhong Wang,<sup>a</sup> Xiao Zhang,<sup>a</sup> Shujing Yu,<sup>a</sup> Yuanyuan Qiao,<sup>c</sup> Xin Wang<sup>a,b,\*</sup> and Peng  
George Wang<sup>a,b,\*</sup>

<sup>a</sup>State Key Laboratory of Elemento-organic Chemistry, Nankai University, Tianjin 300071, PR China

<sup>b</sup>College of Pharmacy, Nankai University, Tianjin 300071, PR China

<sup>c</sup>College of Chemistry, Nankai University, Tianjin 300071, PR China

wangxinnk@nankai.edu.cn; pwang@nankai.edu.cn

## **Supporting Information**

### **Table of contents**

|                                                                    |                  |
|--------------------------------------------------------------------|------------------|
| <b>Part A: General procedures.....</b>                             | <b>S2</b>        |
| <b>Part B: Experimental procedures.....</b>                        | <b>S3 – S7</b>   |
| <b>Part C: HPLC methods.....</b>                                   | <b>S8 – S9</b>   |
| <b>Part D: <sup>1</sup>H- and <sup>13</sup>C-NMR spectra .....</b> | <b>S10 – S25</b> |
| <b>Part E: X-Ray Crystallographic Data .....</b>                   | <b>S26 – S27</b> |

## Part A

### General procedures:

All reactions were carried out under an atmosphere of nitrogen in flame-dried glassware with magnetic stirring unless otherwise indicated. Reagents obtained from Alfa Aesar, Aldrich, and J&K were used without further purification. THF was dried by distillation over Na/benzophenone. CH<sub>2</sub>Cl<sub>2</sub> was dried by distillation over CaH<sub>2</sub>. TLC inspections were performed on silica gel GF254 plates. Column chromatography was performed on silica gel (200–300 mesh). <sup>1</sup>H NMR and <sup>13</sup>C NMR spectra were recorded on a Bruker AVANCE AV400 (400MHz and 100MHz). Signal positions were recorded in ppm with the abbreviations s, d, t, and m denoting singlet, doublet, triplet, and multiplet respectively. All NMR chemical shifts were referenced to residual solvent peaks or to Si(CH<sub>3</sub>)<sub>4</sub> as an internal standard, spectra recorded in CDCl<sub>3</sub> were referenced to residual CHCl<sub>3</sub> at 7.26 ppm for <sup>1</sup>H NMR or 77.0 ppm for <sup>13</sup>C NMR, spectra recorded in CD<sub>3</sub>OD were referenced to residual CD<sub>2</sub>HOD at 3.31 ppm for <sup>1</sup>H or 49.15 ppm for <sup>13</sup>C, spectra recorded in (CD<sub>3</sub>)<sub>2</sub>SO were referenced to residual (CH<sub>3</sub>)<sub>2</sub>SO at 2.50 ppm for <sup>1</sup>H or 39.52 ppm for <sup>13</sup>C. All coupling constants *J* were quoted in Hz. HPLC analysis was performed on Shimadzu CTO-10AS by using a Chiralpak AD-H column purchased from Daicel Chemical Industries. High resolution mass spectra (HRMS) were obtained on a IonSpec QFT mass spectrometer with ESI ionization. Optical rotations were recorded on a Perkin–Elmer 341 polarimeter. Melting points were measured on X4 apparatus.

## Part B

### Preparation of compound 2:

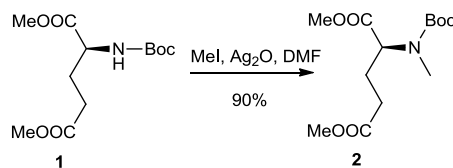

Compound **1** (7.6 g, 27.7 mmol) was dissolved in anhydrous DMF (50 mL). To the resulting solution was added CH<sub>3</sub>I (68.9 mL, 1108 mmol) and Ag<sub>2</sub>O (19.25 g, 83.1 mmol). The mixture was stirred at room temperature for 24 h. The saturated Na<sub>2</sub>SO<sub>3</sub> was added and the aqueous was extracted with EtOAc (200 mL × 3), the combined organic layer was washed with brine and dried over Na<sub>2</sub>SO<sub>4</sub>. Purification by silica gel column chromatography (PE/EtOAc 3:1) to afford the product **2** (7.2 g, 90% yield) as an oil.

**2**: TLC (PE:EtOAc, 75:25 v/v): R<sub>f</sub> = 0.60; [α]<sub>D</sub><sup>25</sup> = -35.0° (c = 1.0, CHCl<sub>3</sub>); <sup>1</sup>H NMR (400 MHz, CDCl<sub>3</sub>) Mixture of rotamers δ 4.75 (m, 0.5H), 4.73 (m, 0.5H), 3.73 (s, 3H), 3.69 (s, 3H), 2.80 (d, *J* = 18.4 Hz, 3H), 2.33 (m, 1H), 2.04 (m, 1H), 1.45 (d, *J* = 14.4 Hz, 9H); <sup>13</sup>C NMR (100 MHz, CDCl<sub>3</sub>) Mixture of rotamers δ 173.1, 171.7, 171.6, 156.2, 155.3, 80.5, 80.2, 77.4, 76.8, 58.9, 57.4, 52.1, 51.6, 31.9, 30.9, 30.5, 30.2, 28.2, 24.4; HRMS (ESI) *m/z* calcd for C<sub>13</sub>H<sub>23</sub>NO<sub>6</sub> (M + Na)<sup>+</sup> 312.1418; found 312.1415.

### Preparation of compound 3:

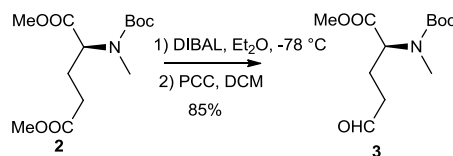

To a stirred solution of **2** (7.2g, 24.9 mmol) in anhydrous ether (200 mL) was added DIBAL (27.5 mL, 1.0 M in hexane, 27.5 mmol) dropwise at -78 °C. The reaction mixture was stirred for 5 min, then quenched with H<sub>2</sub>O (5 mL) and allowed to warm to room temperature. The mixture was stirred for 30 min, dried over MgSO<sub>4</sub> and filtered through a pad of Celite. The filtrate was evaporated and the residue was purified by silica gel column chromatography (PE/EtOAc 3:1) to yield **3** (5.5 g, 85% yield) as an oil.

**3**: TLC (PE:EtOAc, 75:25 v/v): R<sub>f</sub> = 0.55; [α]<sub>D</sub><sup>25</sup> = -18.4° (c = 1.0, CHCl<sub>3</sub>); <sup>1</sup>H NMR (400 MHz, CDCl<sub>3</sub>) Mixture of rotamers δ 9.77 (d, *J* = 4.4 Hz, 1H), 4.69 (dd, *J* = 10.4 Hz, 4.8Hz, 0.5H), 4.37 (dd, *J* = 10.0 Hz, 5.2Hz, 0.5H), 3.72 (s, 3H), 2.81 (s, 1.5H), 2.76 (s, 1.5H), 2.51 (m, 2H), 2.30 (m, 1H), 2.03 (m, 1H), 1.46 (s, 4.5H), 1.42 (s, 4.5H); <sup>13</sup>C NMR R (100 MHz, CDCl<sub>3</sub>) Mixture of rotamers δ 199.9, 199.8, 170.6, 155.3, 154.3, 79.7, 79.4, 57.8, 56.6, 51.2, 30.4, 30.2, 29.2, 28.7, 27.3, 20.8, 20.3; HRMS (ESI) *m/z* calcd for C<sub>12</sub>H<sub>21</sub>NO<sub>5</sub> (M + Na)<sup>+</sup> 282.1312; found 282.1313.

### Preparation of compound 5:

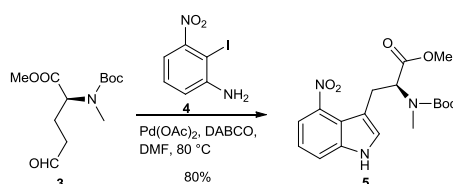

A mixture of 3-nitro-2-iodo-aniline **4** (11.2 g, 42.4 mmol), aldehyde **3** (5.5 g, 21.2 mmol) and DABCO (14.0 g, 63.6 mmol) in DMF (100 mL) was degassed for 20min. Pd(OAc)<sub>2</sub> (476 mg, 2.12 mmol) was added, and the resulting reaction mixture was heated at 80°C under nitrogen atmosphere for 12h. The reaction mixture was then cooled to room temperature and diluted with water followed by extraction with EtOAc (3 × 100mL). The combined organic phases were washed with brine and dried over Na<sub>2</sub>SO<sub>4</sub>. After the purification by silica gel column chromatography (PE/EtOAc 5:1→PE/EtOAc 2:1), the starting aniline **4** (5.5 g) and the desired product **5** (6.4 g, 80% based on **3**) as yellowish powder was afforded.

**5**: mp 128-130°C; TLC (PE:EtOAc, 65:35 v/v): R<sub>f</sub> = 0.30; [α]<sub>D</sub><sup>25</sup> = -155.4° (c = 1.0, CHCl<sub>3</sub>); <sup>1</sup>H NMR (400 MHz, (CD<sub>3</sub>)<sub>2</sub>SO) Mixture of rotamers δ 11.82 (s, 0.6), 11.77 (s, 0.4), 7.82 (m, 2H), 7.53 (s, 1H), 7.24 (m, 1H), 4.81 (m, 1H), 4.64 (m, 1H), 3.70 (s, 1.8H), 3.68 (s, 1.2H), 3.51 (m, 1H), 3.11 (m, 1H), 2.63 (m, 1.8H), 2.59 (m, 1.2H), 1.10 (s, 3H), 0.91 (s, 6H); <sup>13</sup>C NMR R (100 MHz, (CD<sub>3</sub>)<sub>2</sub>SO) Mixture of rotamers δ 171.1, 154.1, 141.8, 139.4, 130.8, 119.9, 118.7, 118.3, 117.3, 109.1, 78.7, 60.0, 58.7, 52.1, 30.8, 27.6, 27.2, 26.7, 26.5; HRMS (ESI) m/z calcd for C<sub>18</sub>H<sub>23</sub>N<sub>3</sub>O<sub>6</sub> (M - H)<sup>+</sup> 376.1513; found 376.1517.

#### Preparation of compound **6**:

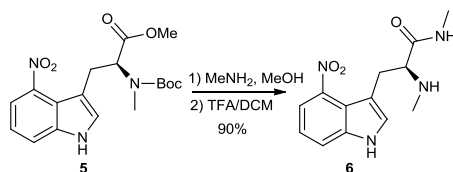

A solution of **5** (6.4 g, 33.9 mmol) and the MeNH<sub>2</sub> (300 mmol) in anhydrous methanol (150 mL) was stirred at room temperature for 7 days. The reaction mixture was concentrated, follow by addition of a mixture of dichloromethane (80 mL) and trifluoroacetic acid (20 mL), and stirring was continued at room temperature for another 30min. The reaction mixture was concentrated, the product **6** was obtained after recrystallization from methanol (4.2 g, 90% yield) as yellowish powder.

**6**: mp 134-136°C; TLC (CH<sub>2</sub>Cl<sub>2</sub>:CH<sub>3</sub>OH, 75:25 v/v): R<sub>f</sub> = 0.40; [α]<sub>D</sub><sup>25</sup> = +124.0° (c = 1.0, CH<sub>3</sub>OH); <sup>1</sup>H-NMR (CD<sub>3</sub>OD, 400Mz) δ 7.87 (d, J = 8.0 Hz, 1H), 7.73 (d, J = 8.0 Hz, 1H), 7.36 (s, 1H), 7.20 (t, J = 8.0 Hz, 1H), 3.40 (m, 2H), 3.12 (m, 1H), 2.58 (s, 3H), 2.40 (s, 3H); <sup>13</sup>C NMR (100 MHz, CD<sub>3</sub>OD) δ 26.0, 31.6, 33.9, 66.5, 110.1, 118.7, 119.3, 120.1, 121.2, 131.3, 141.2, 143.7, 174.4; HRMS: Calcd for C<sub>13</sub>H<sub>16</sub>N<sub>4</sub>O<sub>3</sub> (M + H)<sup>+</sup> 277.1295, found 277.1293.

#### Preparation of compound **8**:

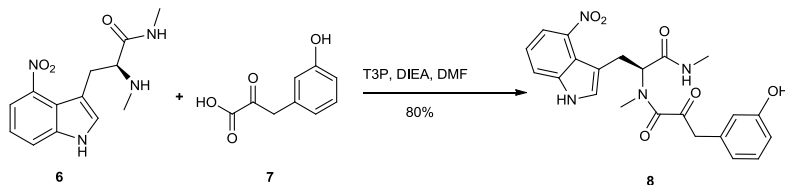

To a stirred solution of 4-nitrotryptophan derivative **6** (750 mg, 2.7 mmol), arylpyruvic acid **7** (730 mg, 4.1 mmol) and DIEA (1.45 mL, 8.1 mmol) in DMF (20 mL) was added propylphosphonic acid anhydride (cyclic trimer, T3P) (48% in DMF, 2.6 mL, 4.1 mmol) dropwise at room temperature. The reaction mixture was stirred at room temperature for 12h, concentrated, the residue was then purified by silica gel column chromatography (DCM/MeOH 10:1 →

DCM/MeOH 3:1) to yield **8** (1190 mg, 80% yield) as yellowish powder.

**8**: mp 181-182°C; TLC (CH<sub>2</sub>Cl<sub>2</sub>:CH<sub>3</sub>OH, 75:25 v/v): R<sub>f</sub> = 0.25; [α]<sub>D</sub><sup>25</sup> = -92.4 ° (c = 1.0, CH<sub>3</sub>OH); <sup>1</sup>H-NMR (CD<sub>3</sub>OD, 400Mz) δ 7.86 (d, *J* = 8.0 Hz, 0.5H), 7.73 (d, *J* = 8.0 Hz, 0.5H), 7.67 (m, 0.3H), 7.57 (m, 0.3H), 7.50 (d, *J* = 8.4 Hz, 0.5H), 7.42 (s, 0.5H), 7.35 (d, *J* = 8.0 Hz, 0.5H), 7.23 (s, 0.5), 7.20 (t, *J* = 8.0 Hz, 0.5H), 7.13 (s, 1H), 7.04 (t, *J* = 8.0 Hz, 0.5H), 6.65 (t, *J* = 8.0 Hz, 0.5H), 6.78 (m, 1H), 6.67 (s, 0.5H), 6.60 (d, *J* = 7.6 Hz, 0.5H), 6.52 (d, *J* = 7.6 Hz, 0.5H), 6.23 (d, *J* = 7.6 Hz, 0.5H), 4.80 (s, 0.5H), 4.55 (s, 0.5H), 3.65 (m, 0.5H), 3.73 (m, 0.5H), 3.24 (m, 1.0H), 2.95 (m, 0.8H), 2.87 (s, 1.5H), 2.85 (s, 1.5H), 2.81 (s, 1.5H), 2.74 (s, 1.5H); <sup>13</sup>C NMR (100 MHz, CD<sub>3</sub>OD) δ 172.6, 172.7, 171.1, 170.6, 158.3, 157.7, 144.1, 143.2, 141.2, 140.9, 136.0, 135.2, 132.3, 131.1, 130.8, 130.2, 129.8, 129.6, 122.2, 121.8, 121.2, 121.1, 120.6, 120.4, 119.8, 119.7, 119.1, 119.0, 118.8, 118.5, 116.7, 116.6, 115.9, 115.8, 111.6, 111.1, 66.6, 64.3, 31.7, 30.5, 27.1, 27.0, 26.6, 26.5; HRMS: Calcd for C<sub>22</sub>H<sub>22</sub>N<sub>4</sub>O<sub>6</sub> (M + Na)<sup>+</sup> 461.1432; found.461.1441.

### Preparation of TA and iso-TA:

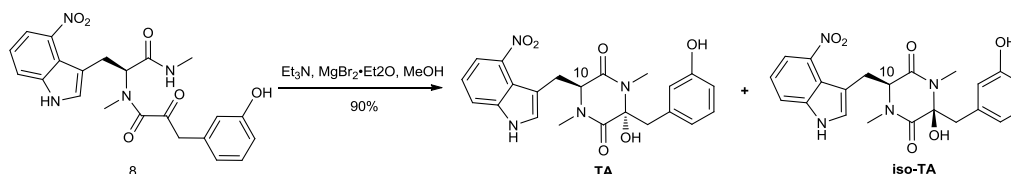

A solution of **8** (1190 mg, 2.7 mmol), MgBr<sub>2</sub>·Et<sub>2</sub>O (7.0 g, 27 mmol) and Et<sub>3</sub>N (100 mL) in MeOH (100 mL) was stirred at room temperature for 7 days, then concentrated. The residue was diluted with water followed by extraction with EtOAc. The combined organic phases were washed with brine, dried over Na<sub>2</sub>SO<sub>4</sub> and concentrated. Purification of the residue by silica gel column chromatography (DCM/MeOH 10:1), afforded the mixture of TA and iso-TA (904 mg, 90% based on **8**) as yellowish powder. The ratio of TA and iso-TA was determined to be 1:2.5 by <sup>1</sup>H NMR analysis (M-TA-1). Purification by preparative TLC (DCM-MeOH, 20:1), the mixture (7mg) afforded TA (2 mg) with 99% ee (TA-0) and iso-TA (5 mg). After recrystallization from MeOH, other mixture gave pure iso-TA (219mg). Treatment of mother liquid with Et<sub>3</sub>N (1 mL) and anhydrous MeOH (50 mL) under reflux condition for 1h, then the reaction mixture was concentrated, the ratio of TA and iso-TA conversed to 2.6:1 (M-TA-MeOH). Recrystallization of the mixture from MeOH afforded the pure product TA (165 mg) with 99% C-10 *de* (TA-1).

TA: mp 227-229°C; TLC (CH<sub>2</sub>Cl<sub>2</sub>:CH<sub>3</sub>OH, 95:5 v/v): R<sub>f</sub> = 0.20; [α]<sub>D</sub><sup>33</sup> = +15.2 ° (c = 0.5, CH<sub>3</sub>OH); HRMS: Calcd for C<sub>22</sub>H<sub>22</sub>N<sub>4</sub>O<sub>6</sub> (M + H)<sup>+</sup> 439.1612; found.439.1612. The <sup>1</sup>H NMR and <sup>13</sup>C NMR spectra of synthetic TA were in good agreement with those of authentic sample.

iso-TA: mp 225-226°C; TLC (CH<sub>2</sub>Cl<sub>2</sub>:CH<sub>3</sub>OH, 95:5 v/v): R<sub>f</sub> = 0.22; [α]<sub>D</sub><sup>33</sup> = +49.8 ° (c = 0.5, CH<sub>3</sub>OH); <sup>1</sup>H-NMR (CD<sub>3</sub>OD, 400Mz) δ 7.75 (d, 1H, *J* = 7.6 Hz), 7.70 (d, 1H, *J* = 7.6 Hz), 7.18 (t, 2H, *J* = 7.2 Hz), 7.03 (t, 1H, *J* = 8.0 Hz), 6.66 (m, 1H), 6.43 (m, 2H), 3.55 (m, 1H), 3.29 (m, 2H), 3.13 (d, 1H, *J* = 13.2 Hz), 2.99 (d, 1H, *J* = 13.2 Hz), 2.79 (s, 3H), 2.77 (s, 3H); <sup>13</sup>C NMR (100 MHz, CD<sub>3</sub>OD) δ 168.5, 167.8, 158.6, 144.2, 140.8, 136.8, 130.4, 130.2, 121.7, 121.1, 120.2, 118.9, 118.4, 117.5, 115.5, 108.8, 87.6, 83.1, 45.0, 33.0, 30.5, 28.2; HRMS: Calcd for C<sub>22</sub>H<sub>22</sub>N<sub>4</sub>O<sub>6</sub> (M + H)<sup>+</sup> 439.1612; found.439.1612.

### Preparation of mirror-TA and mirror-iso-TA:

Mirror-TA and mirror-iso-TA were prepared from D-glutamic acid through the same synthetic rout

e as for TA and iso-TA.

mirror-TA:  $[\alpha]_D^{33} = -15.2^\circ$  ( $c = 0.5$ ,  $\text{CH}_3\text{OH}$ ); The melting point,  $^1\text{H}$  NMR,  $^{13}\text{C}$  NMR spectra and HRMS data are all the same to TA.

Mirror-iso-TA:  $[\alpha]_D^{33} = -49.8^\circ$  ( $c = 0.5$ ,  $\text{CH}_3\text{OH}$ ); The melting point,  $^1\text{H}$  NMR,  $^{13}\text{C}$  NMR spectra and HRMS data are all the same to iso-TA.

### Herbicidal Activity Assay

*Treatment.* The emulsions of purified compounds were prepared by dissolving them in 100  $\mu\text{L}$  of *N,N*-dimethylformamide with the addition of a little Tween 20 and proper water. There were three replicates for each treatment. The mixture of the same amount of water, *N,N*-dimethylformamide, and Tween 20 was used as the control.

*Pre-emergence.* Sandy clay (100 g) in a plastic box (11 cm  $\times$  7.5 cm  $\times$  6 cm) was wetted with water. Fifteen sprouting seeds of the weed under test were planted in fine earth (0.6 cm depth) in the glasshouse and sprayed with the test compound solution.

*Postemergence.* Seedlings (one leaf and one stem) of the weed were sprayed with the test compounds at the same rate as used for the pre-emergence test. For both methods, the fresh weights were determined 20 days later, and the percentage inhibition relative to the controls was calculated.

### Fungicidal Activity Assay

The fungicidal activities of the compounds were tested *in vitro* against *Cercospora arachidicola*, and *Physalospora piricola*, and their relative inhibitory ratio (%) had been determined by using the mycelium growth rate method.<sup>1</sup> Phenazine-1-carboxylic acid was used as a control. After the mycelia grew completely, the diameters of the mycelia were measured and the inhibition rate was calculated according to the formula

$$I = (D1 - D2) / D1 \times 100\%$$

In the formula, *I* is the inhibition rate, *D1* is the average diameter of mycelia in the blank test, and *D2* is the average diameter of mycelia in the presence of those compounds. The inhibition ratio of those compounds at the dose of  $50\mu\text{g mL}^{-1}$  is summarized. The EC<sub>50</sub> of compounds and phenazine-1-carboxylic acid had been experimented and calculated by the Scatchard method.

### Antiviral Biological Assay

*Protective Effect of Compounds against TMV in Vivo.* The compound solution was smeared on the left side, and the solvent served as a control on the right side of growing *Nicotiana tabacum* L. leaves of the same ages. The leaves were then inoculated with the virus after 12 h. A brush was dipped in TMV of  $6 \times 10^{-3}$  mg/mL to inoculate the leaves, which were previously scattered with silicon carbide. The leaves were then washed with water and rubbed softly along the nervature once or twice. The local lesion numbers appearing 3–4 days after inoculation were counted. There are three replicates for each compound.

*Inactivation Effect of Compounds against TMV in Vivo.* The virus was inhibited by mixing with the compound solution at the same volume for 30 min. The mixture was then inoculated on the left side of the leaves of *N. tabacum* L., whereas the right side of the leaves was inoculated with the mixture of solvent and the virus for control. The local lesion numbers were recorded 3–4 days after inoculation. There are three replicates for each compound.

*Curative Effect of Compounds against TMV in Vivo.* Growing leaves of *Nicotiana tabacum* L. of the same ages were selected. TMV (concentration of  $6.0 \times 10^{-3}$  mg/mL) was dipped and inoculated on the whole leaves. Then, the leaves were washed with water and dried. The compound solution was smeared on the left side, and the solvent was smeared on the right side for control. The local lesion numbers were then counted and recorded 3–4 days after inoculation. There are three replicates for each compound.

## References

- (1) Chen, N. C. *Bioassay of Pesticides*; Beijing Agriculture University Press: Beijing, China, 1991, pp 161-162.

## Part C

### HPLC methods

Racemic glutamic acid was used as starting material to establish the separation method for analysis of TA and racemic TA.

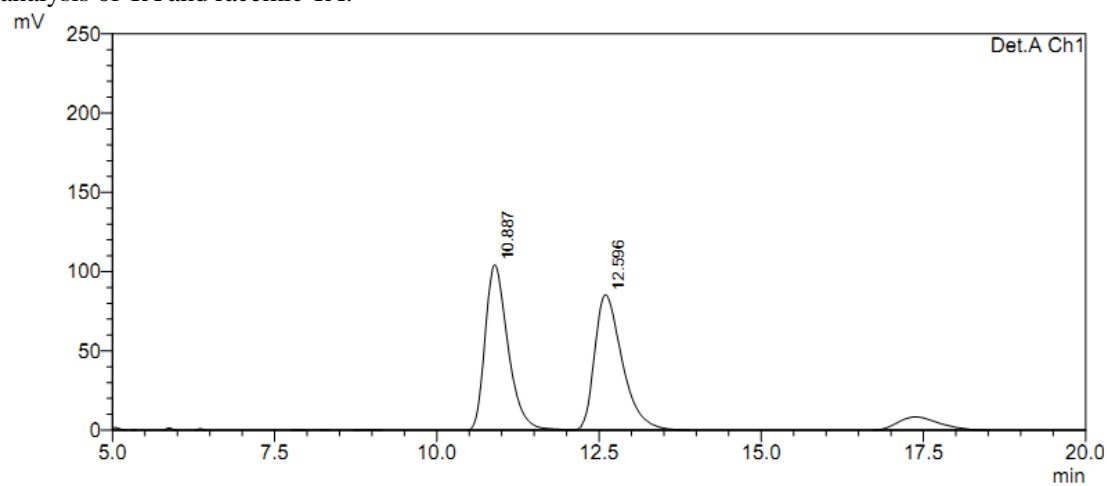

1 Det.A Ch1/254nm

PeakTable

Detector A Ch1 254nm

| Peak# | Ret. Time | Area    | Height | Area %  | Height % |
|-------|-----------|---------|--------|---------|----------|
| 1     | 10.887    | 2611403 | 104924 | 50.040  | 54.921   |
| 2     | 12.596    | 2607237 | 86120  | 49.960  | 45.079   |
| Total |           | 5218640 | 191044 | 100.000 | 100.000  |

**Racemic TA** synthesised from racemic glutamic acid (AD-H, hexane/2-propanol = 85/15, 0.8 mL/min)

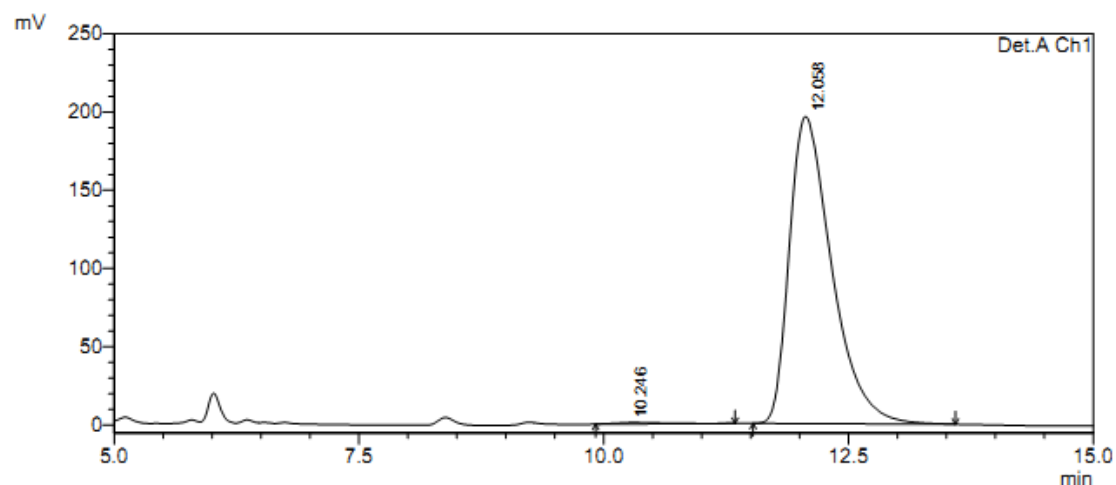

1 Det.A Ch1/254nm

PeakTable

Detector A Ch1 254nm

| Peak# | Ret. Time | Area    | Height | Area %  | Height % |
|-------|-----------|---------|--------|---------|----------|
| 1     | 10.246    | 29602   | 972    | 0.498   | 0.493    |
| 2     | 12.058    | 5910746 | 196264 | 99.502  | 99.507   |
| Total |           | 5940348 | 197236 | 100.000 | 100.000  |

**TA-0** (AD-H, hexane/2-propanol = 85/15, 0.8 mL/min)



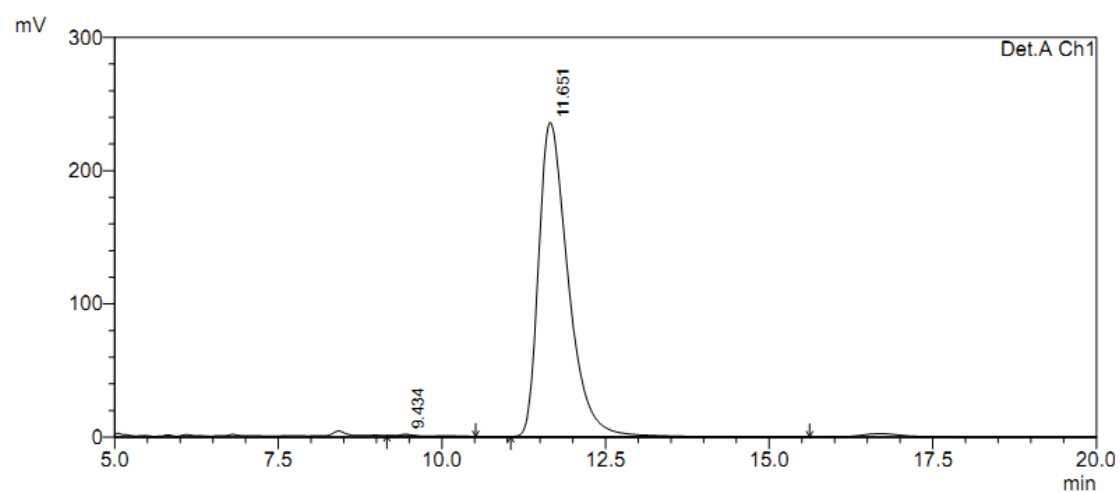

1 Det.A Ch1/254nm

PeakTable

Detector A Ch1 254nm

| Peak# | Ret. Time | Area    | Height | Area %  | Height % |
|-------|-----------|---------|--------|---------|----------|
| 1     | 9.434     | 7187    | 1268   | 0.097   | 0.535    |
| 2     | 11.651    | 7393433 | 235781 | 99.903  | 99.465   |
| Total |           | 7400620 | 237049 | 100.000 | 100.000  |

**TA-1** (AD-H, hexane/2-propanol = 85/15, 0.8 mL/min)

## Part D

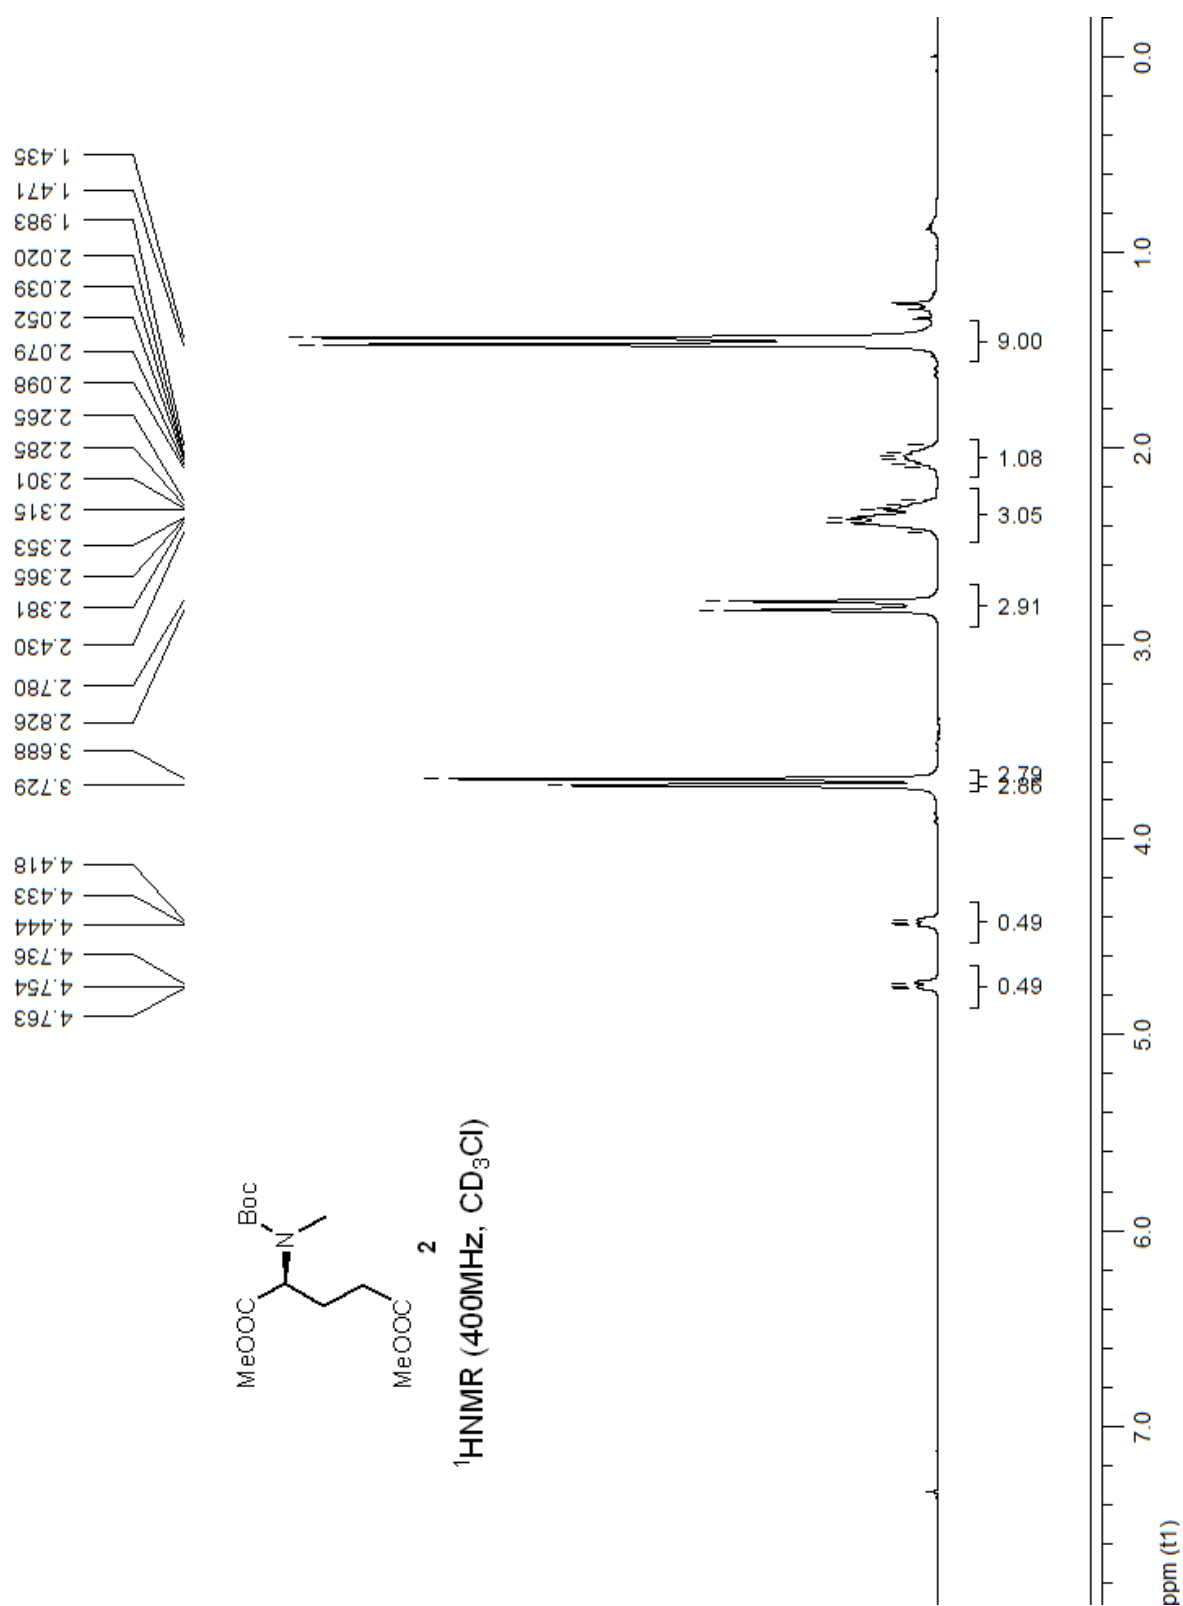

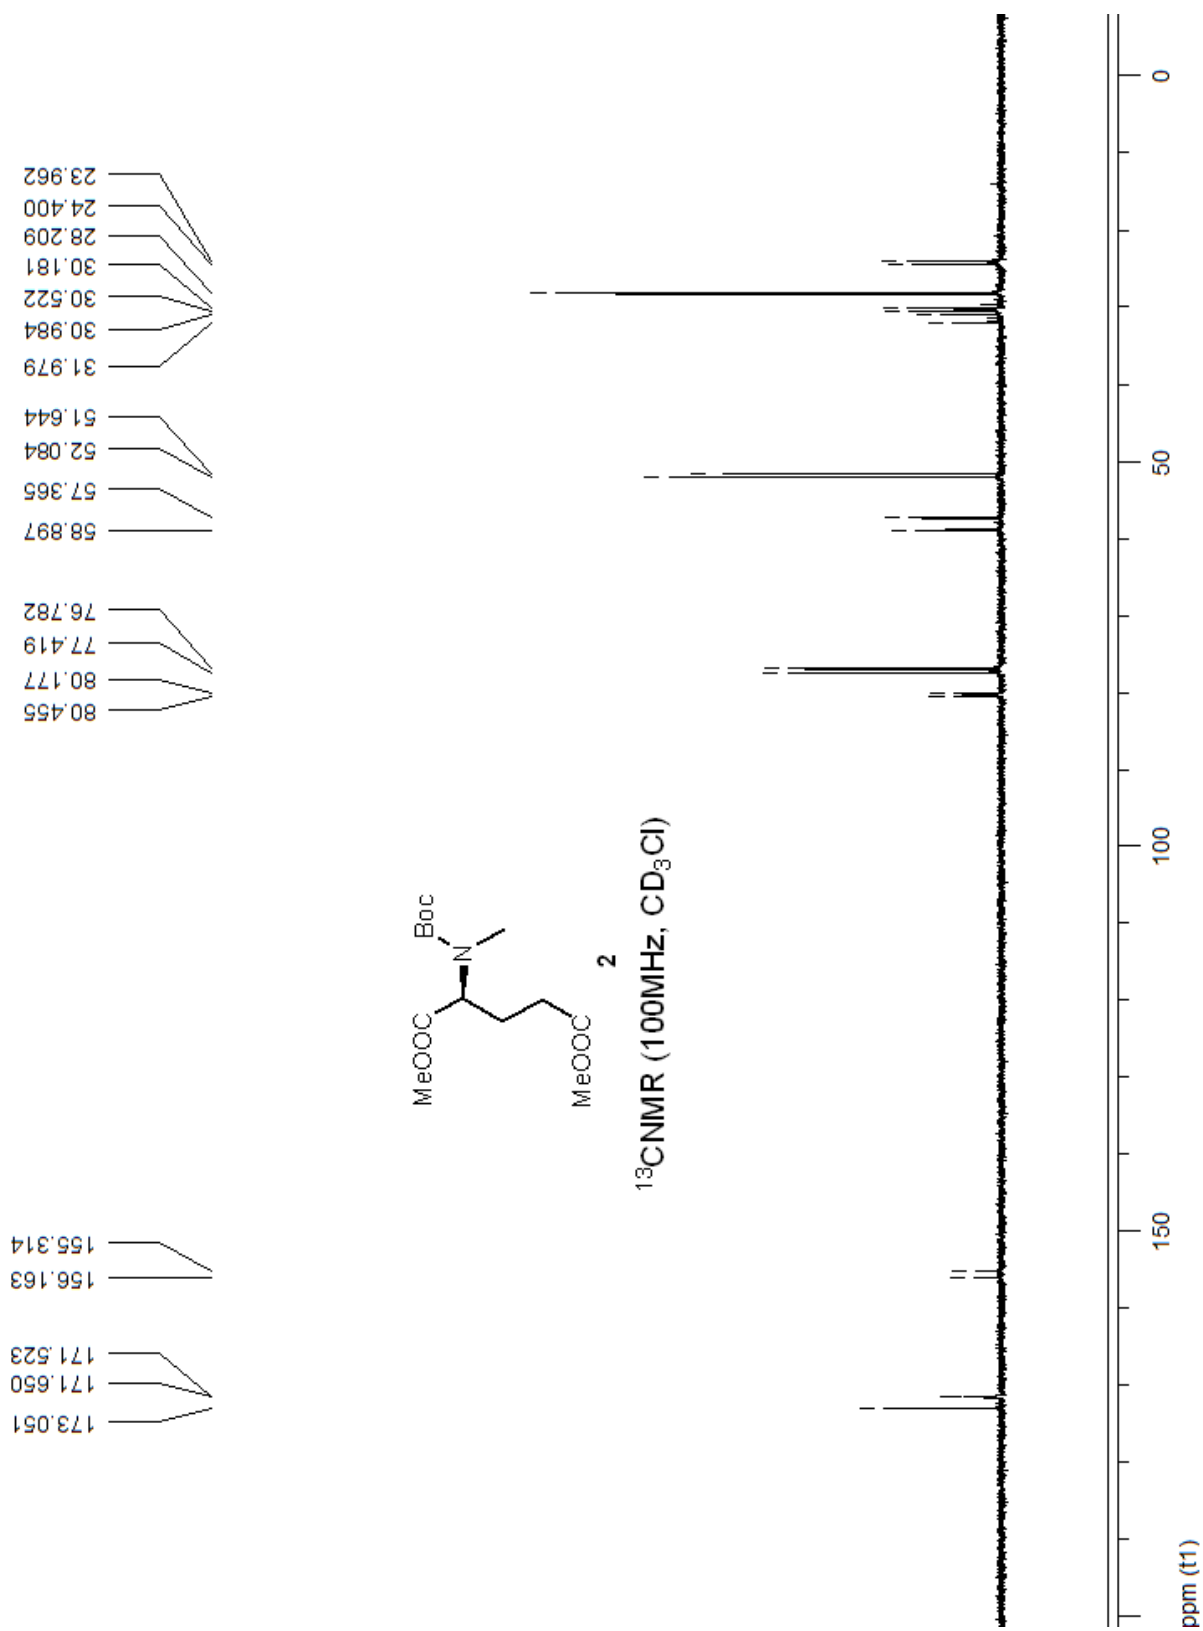

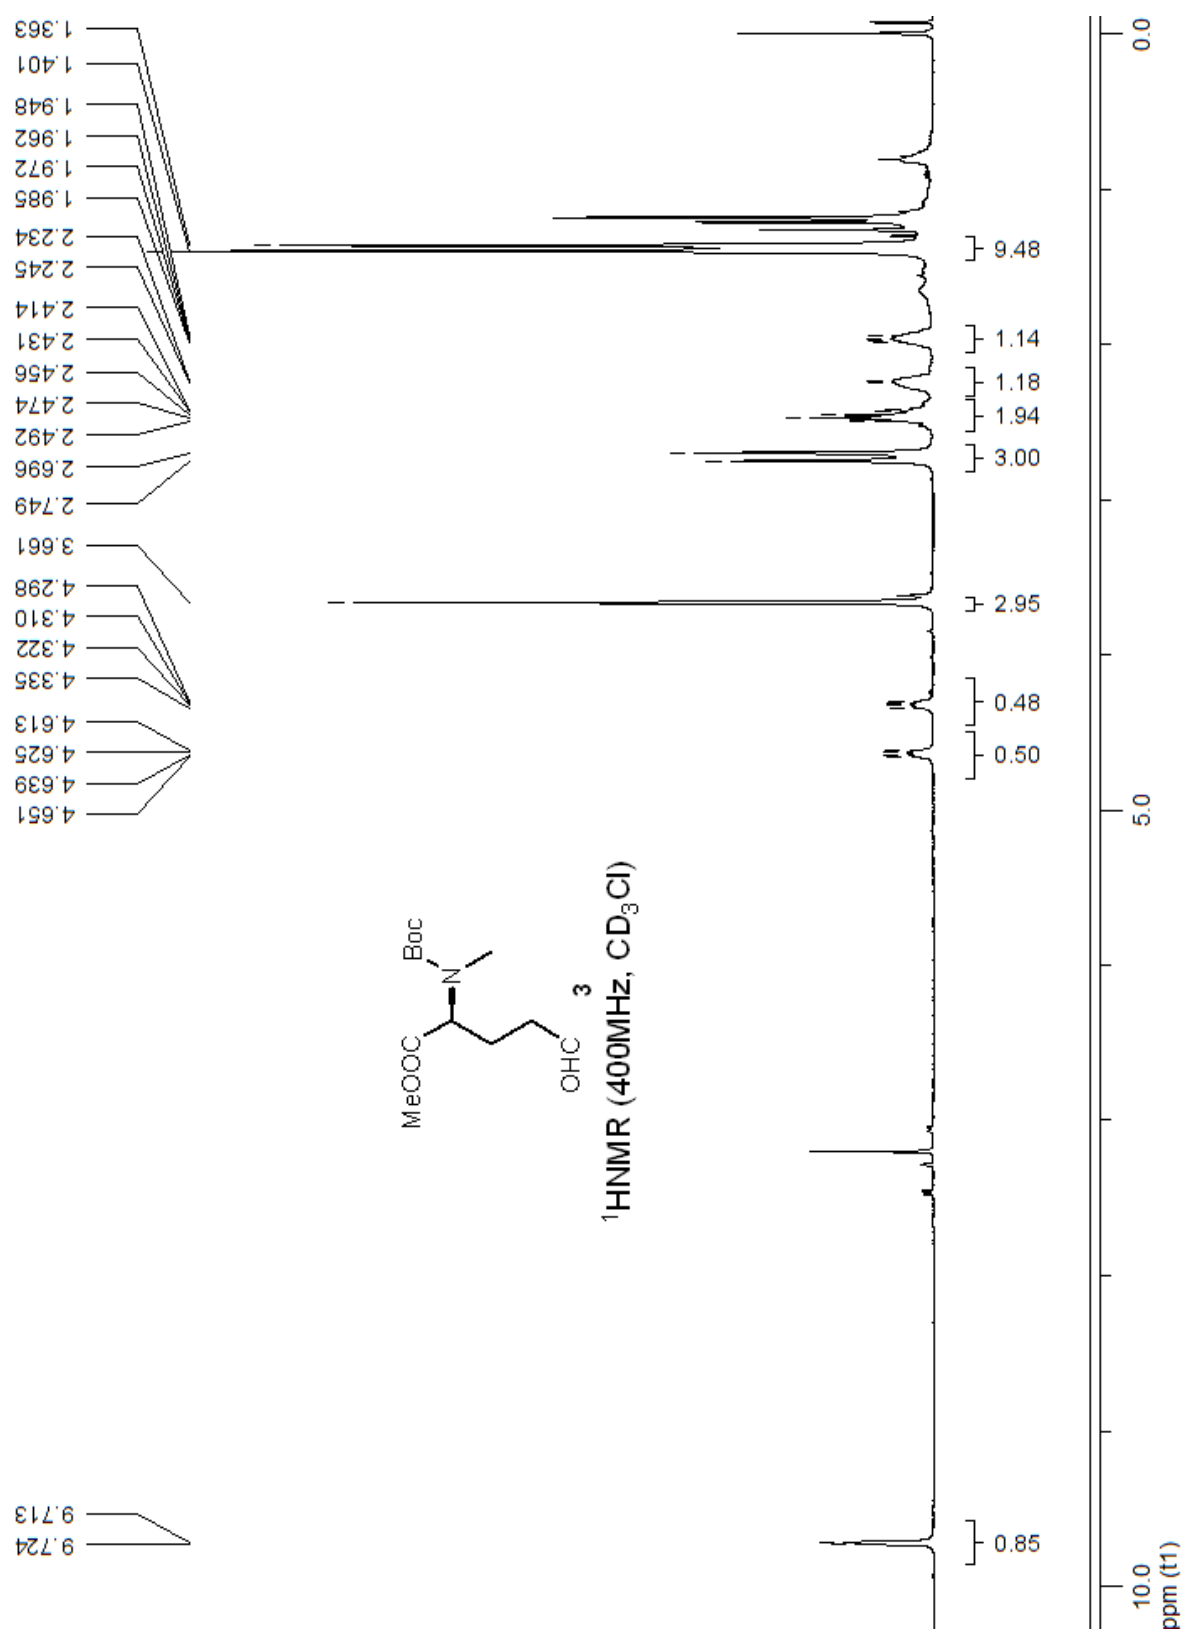

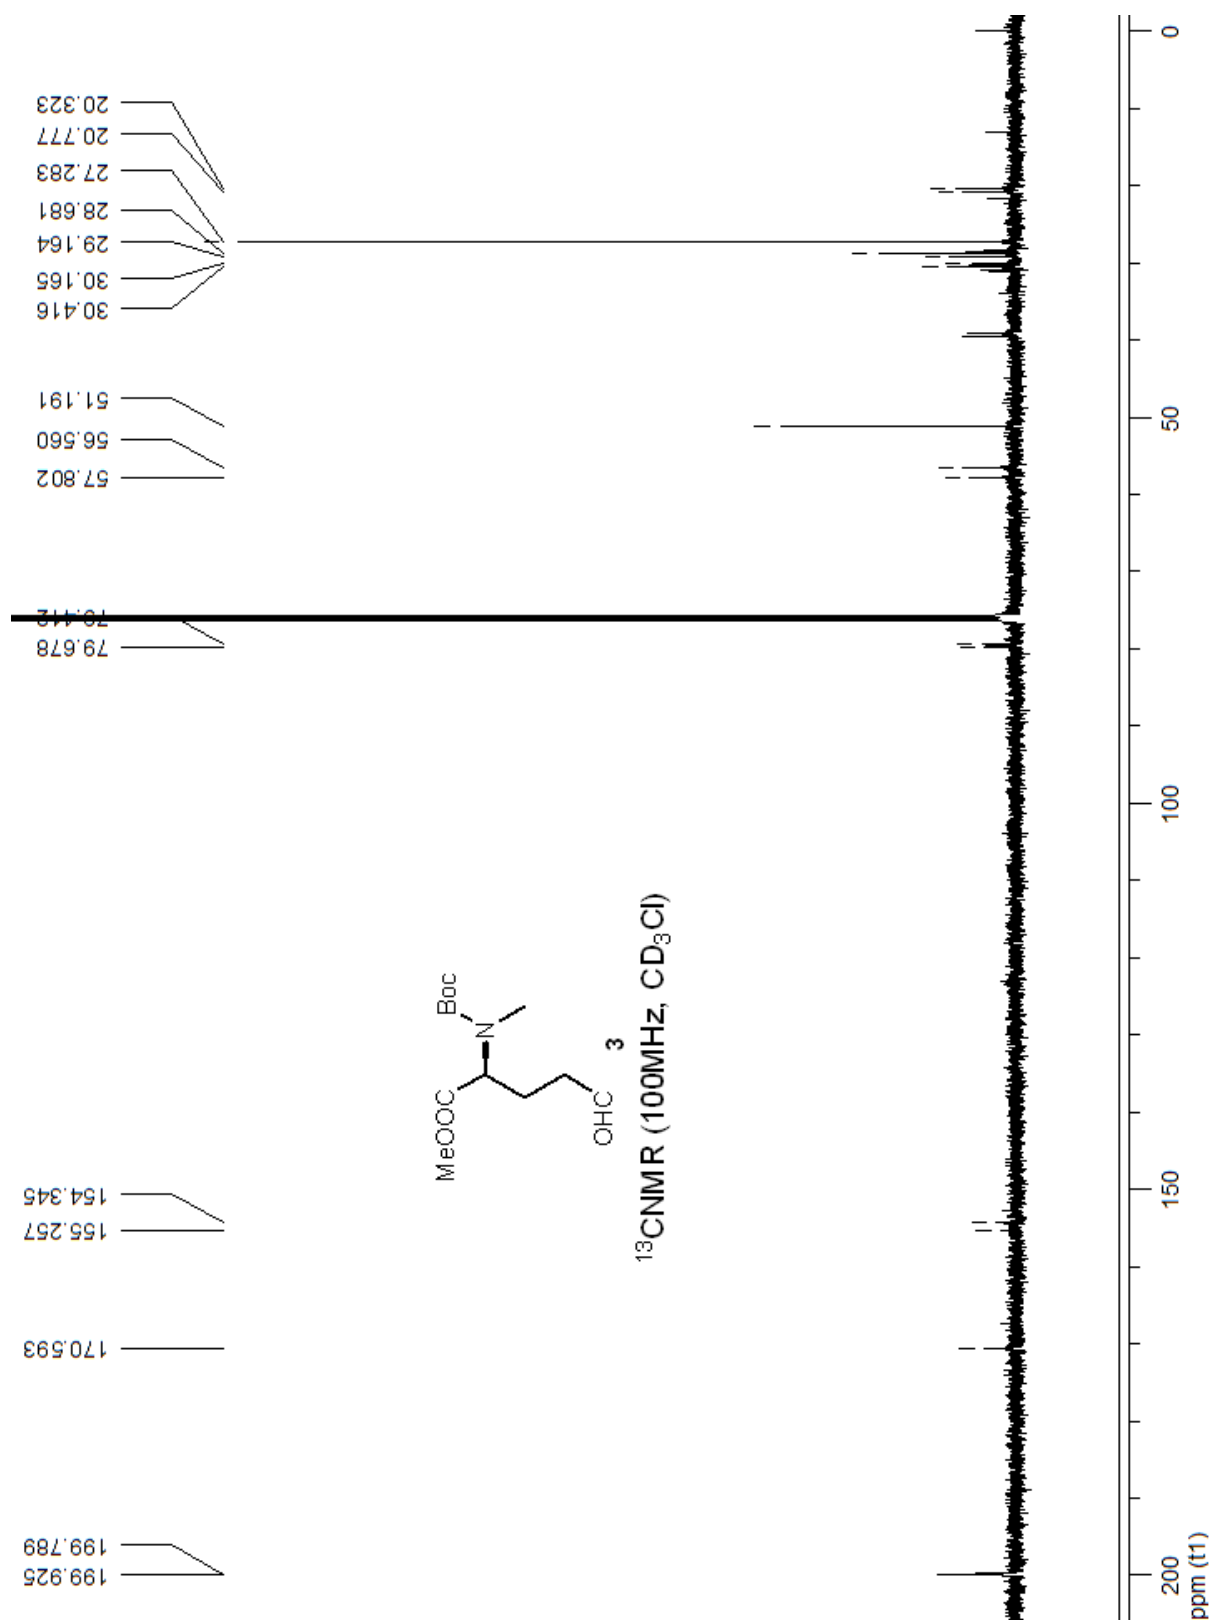

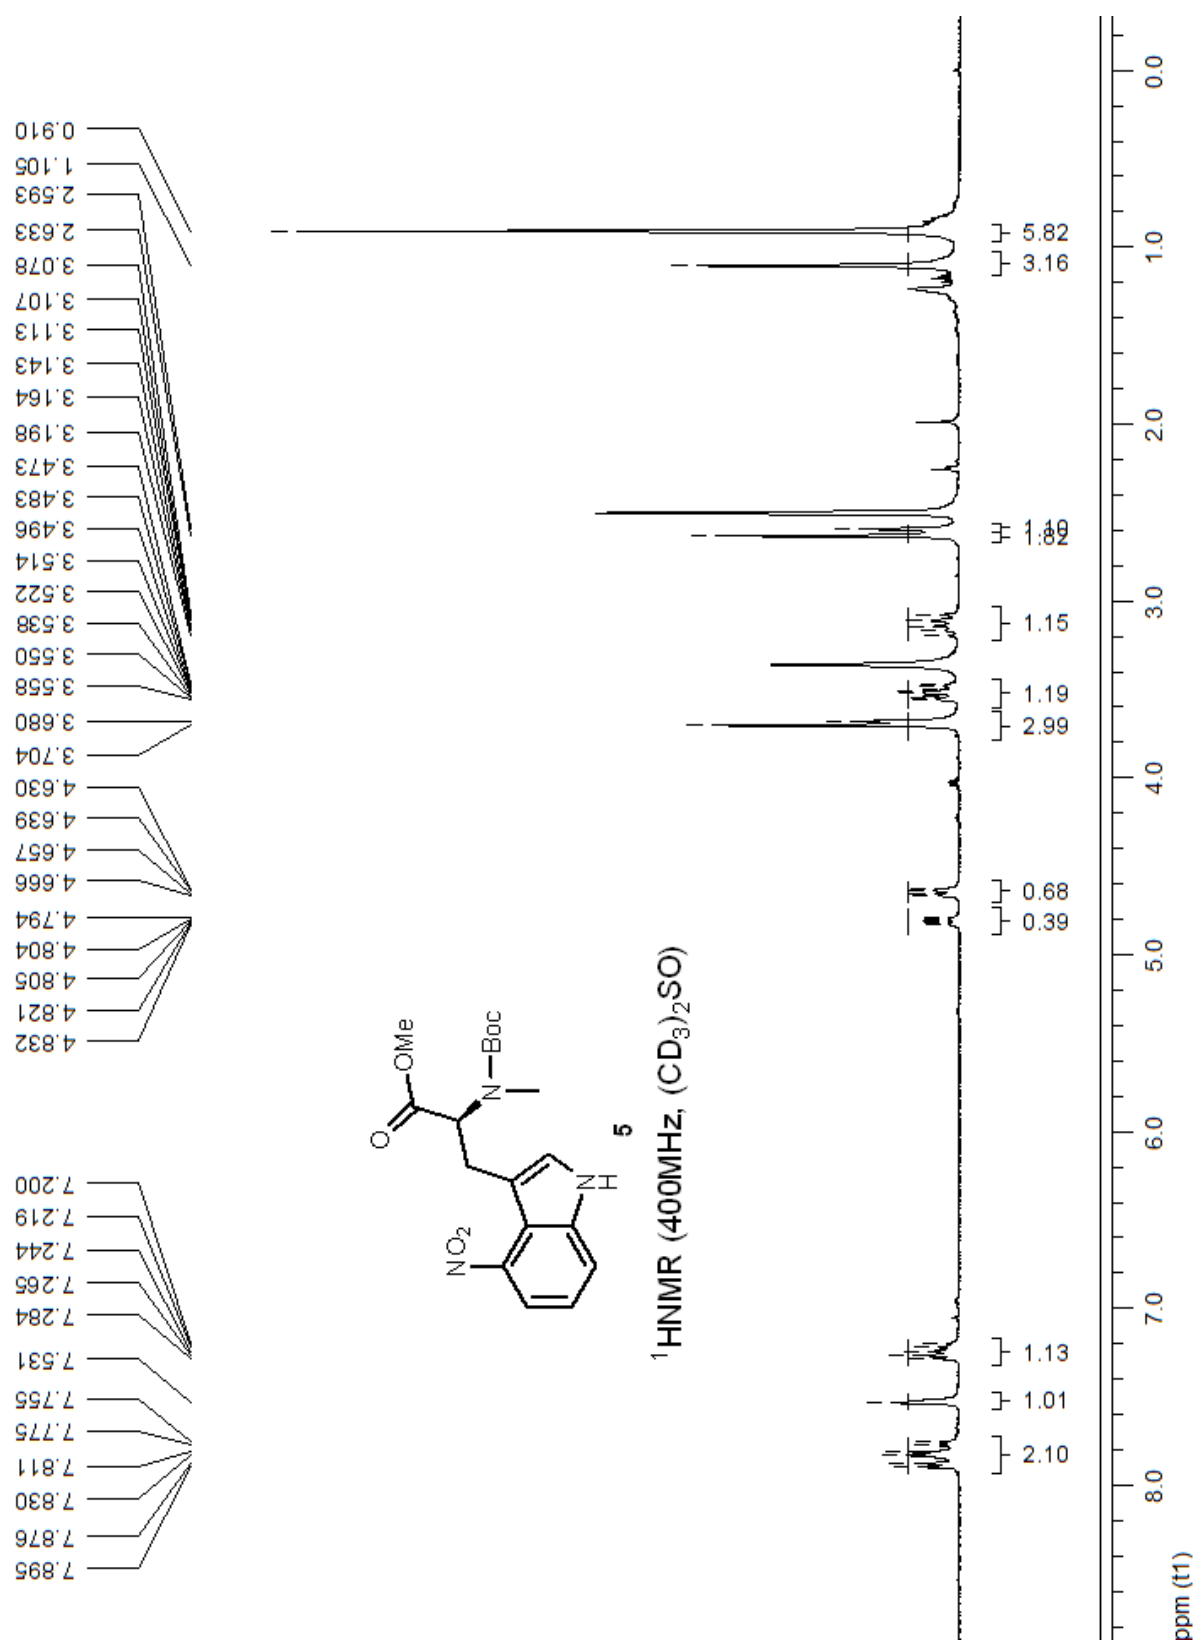

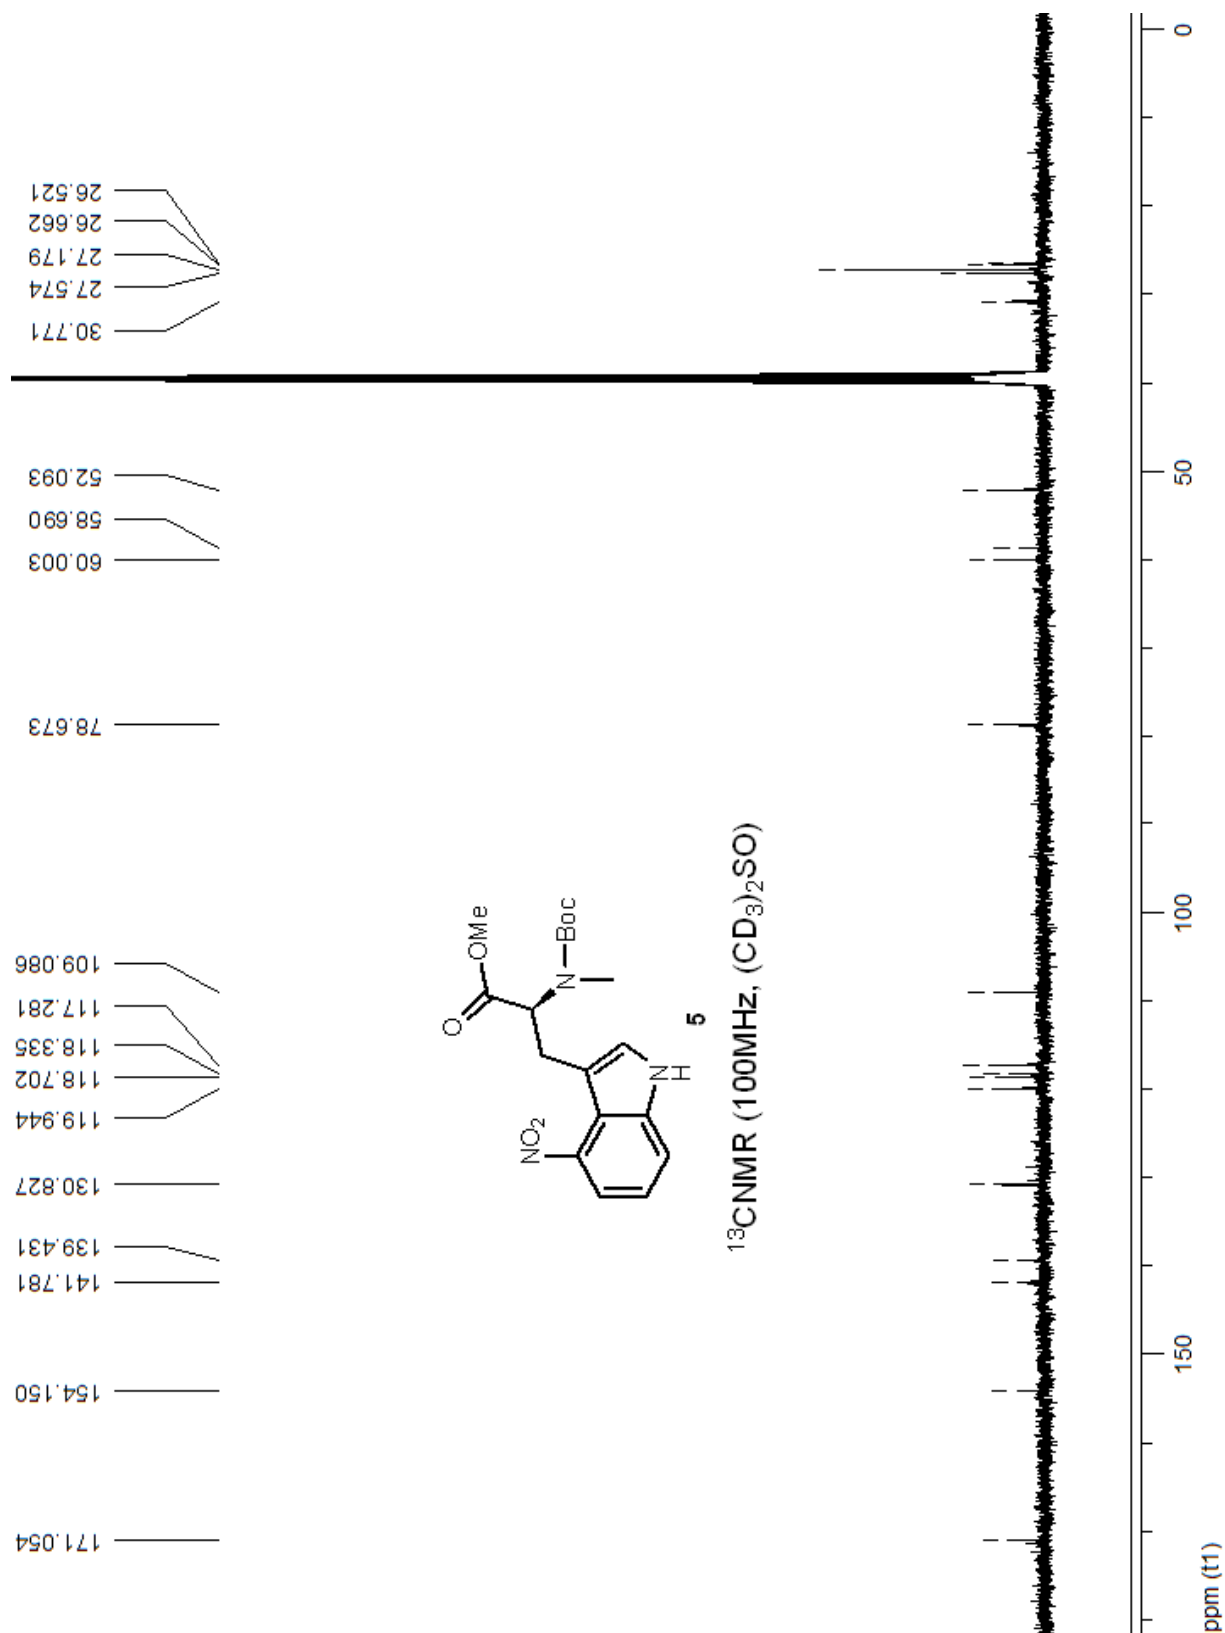

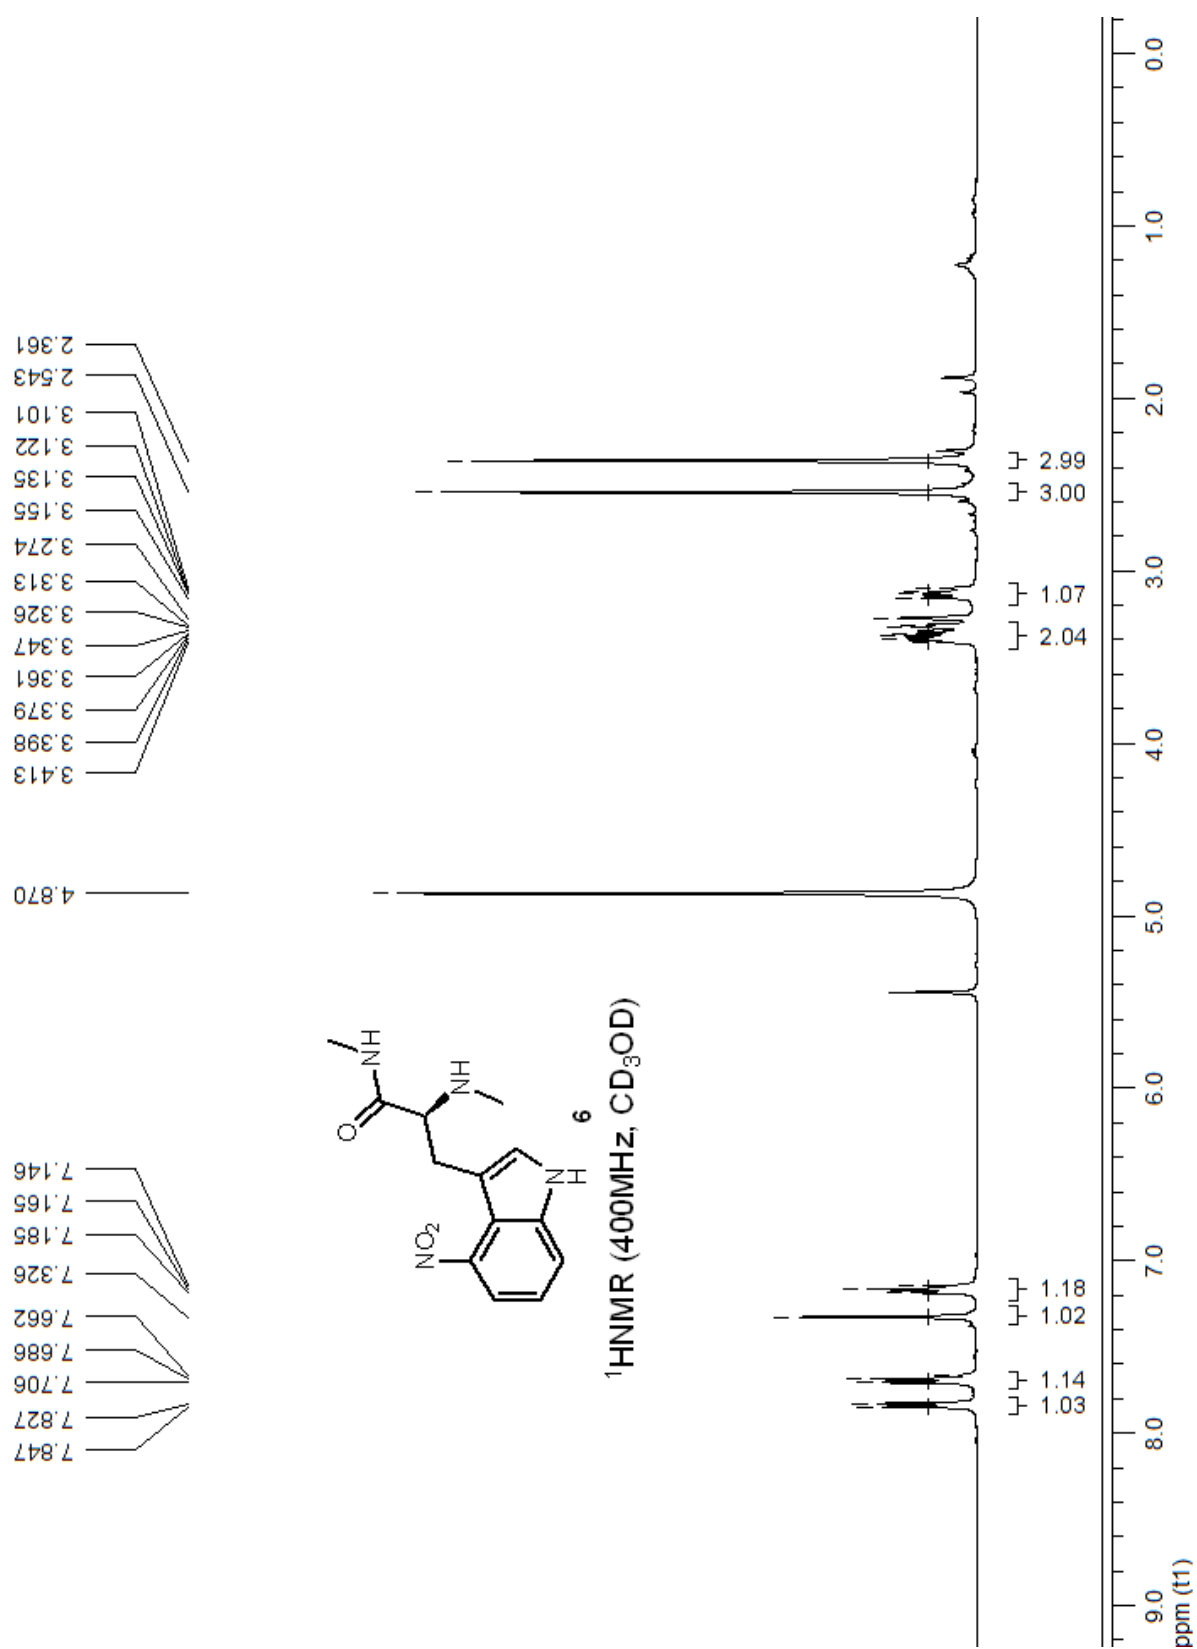



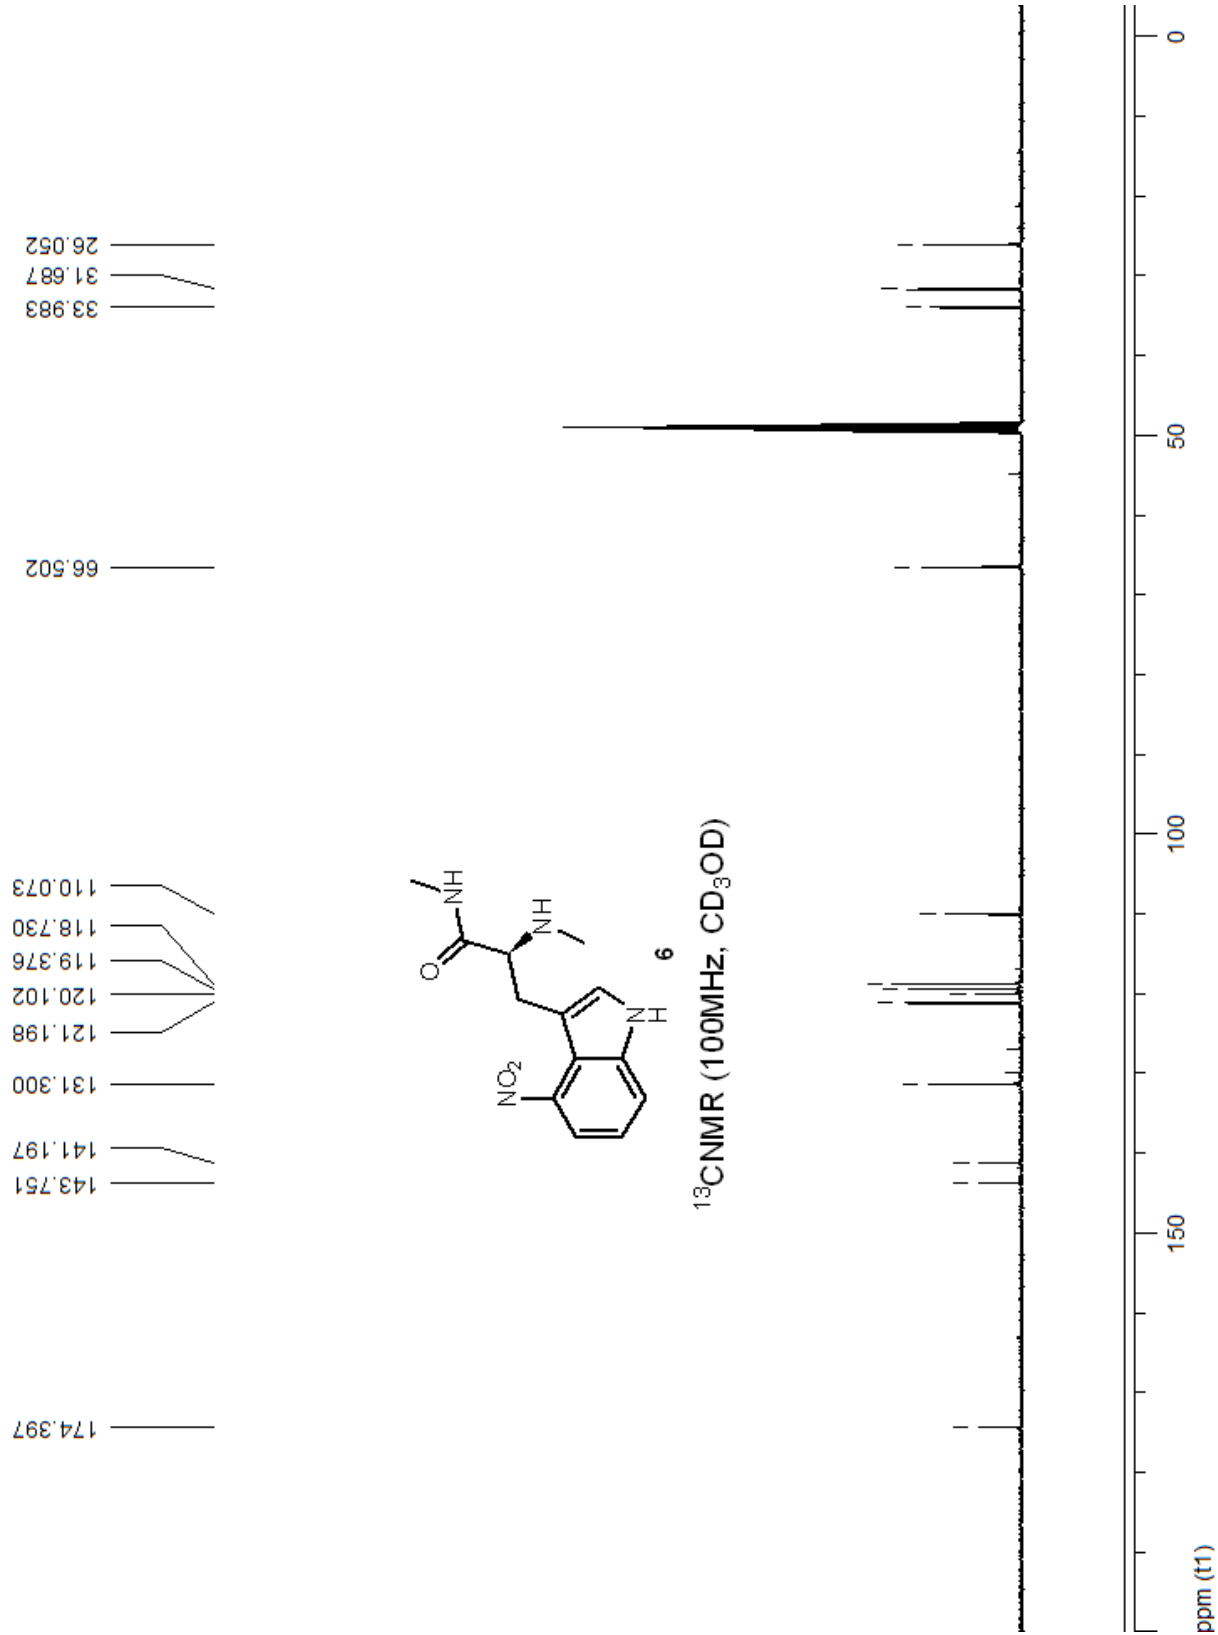

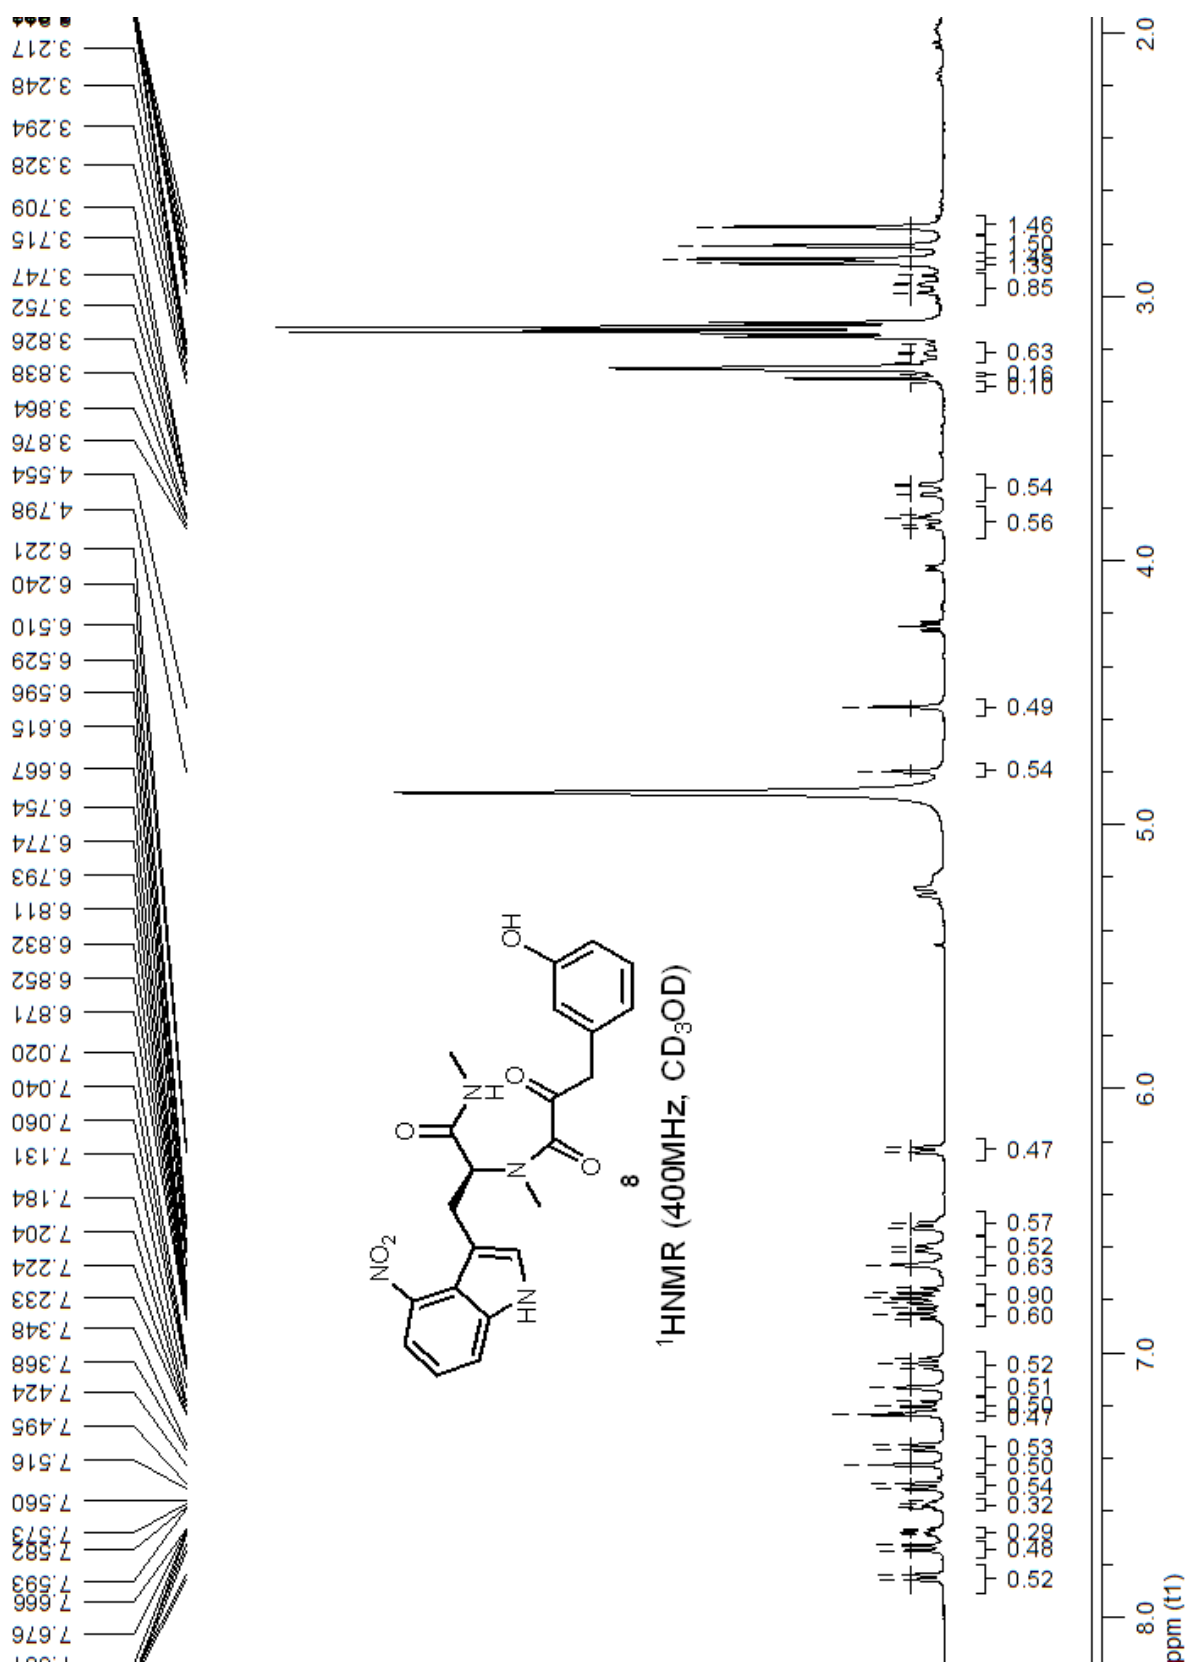

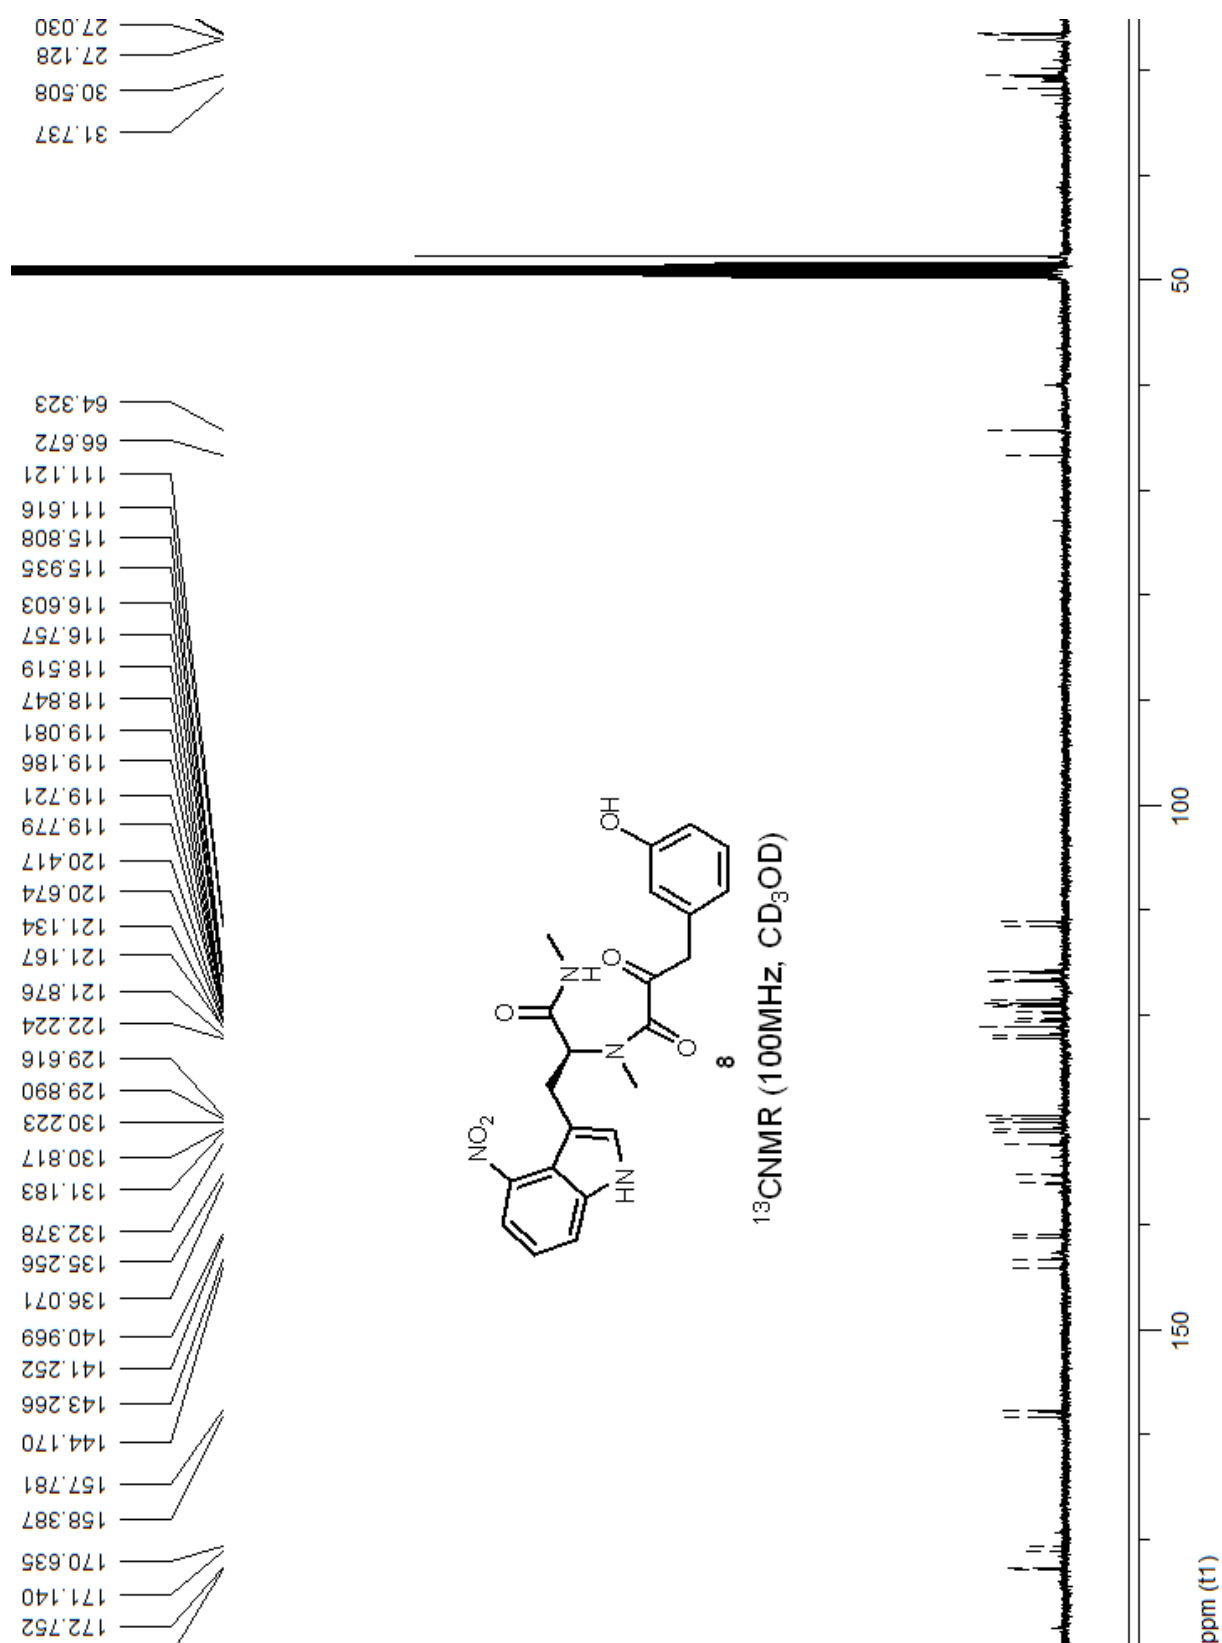

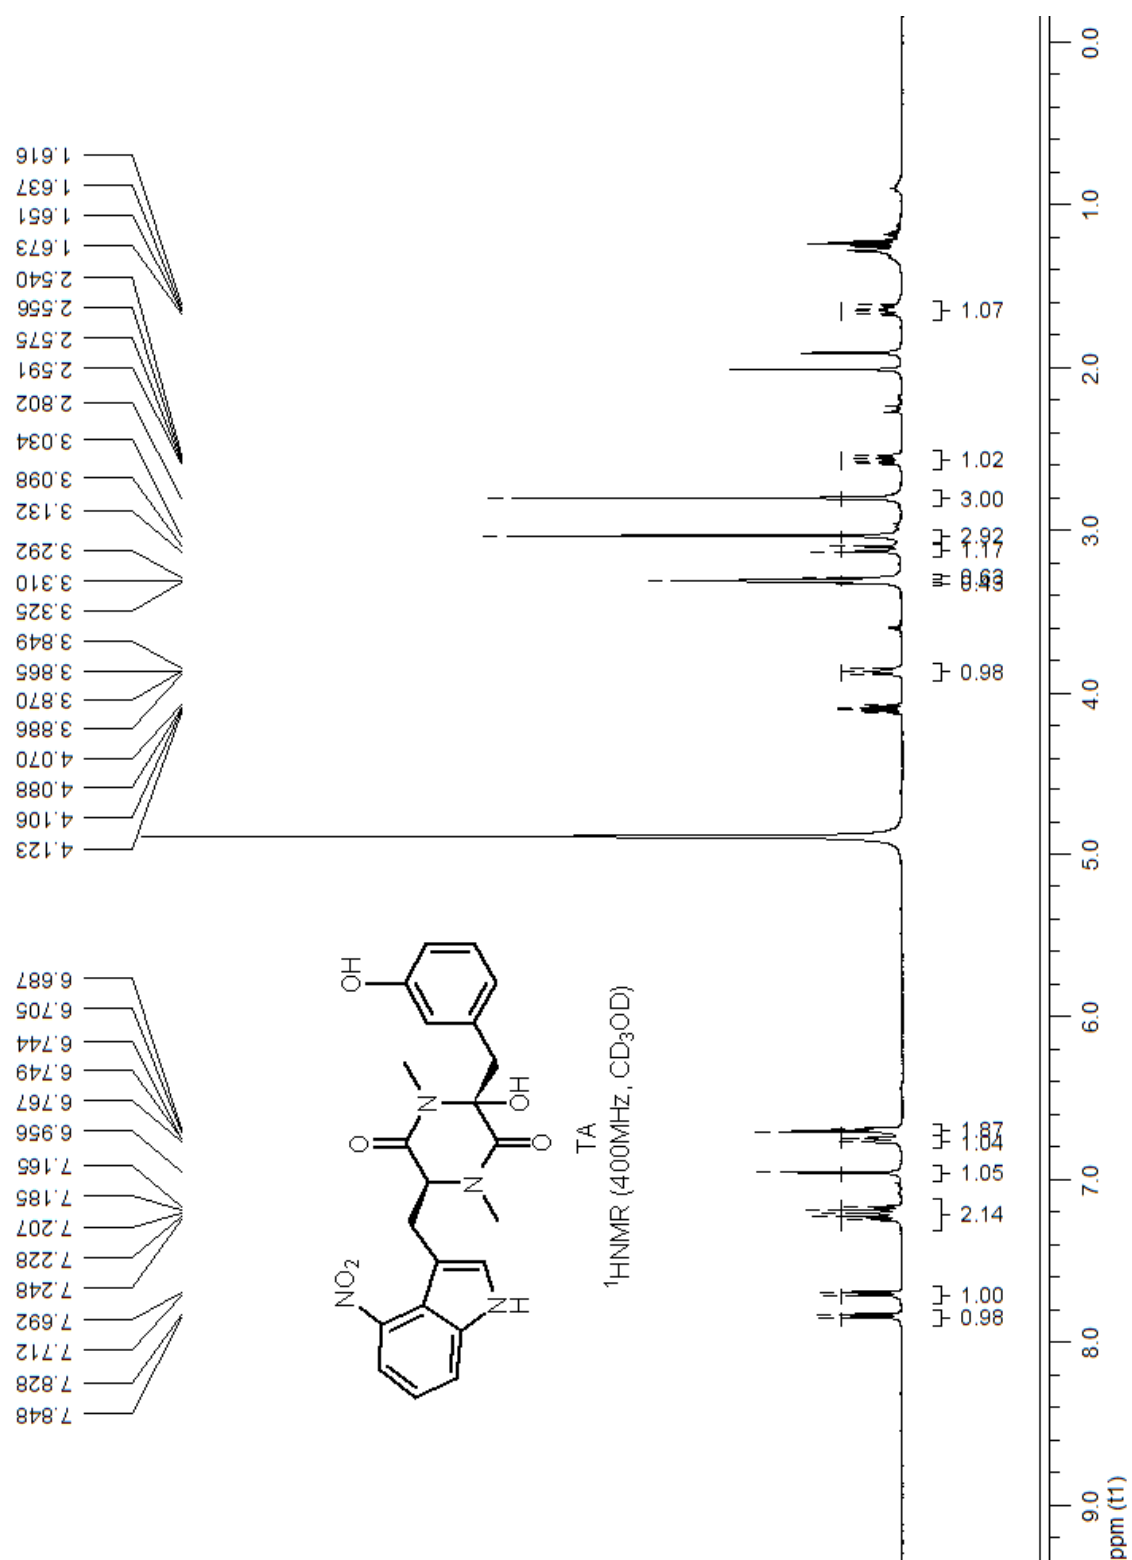

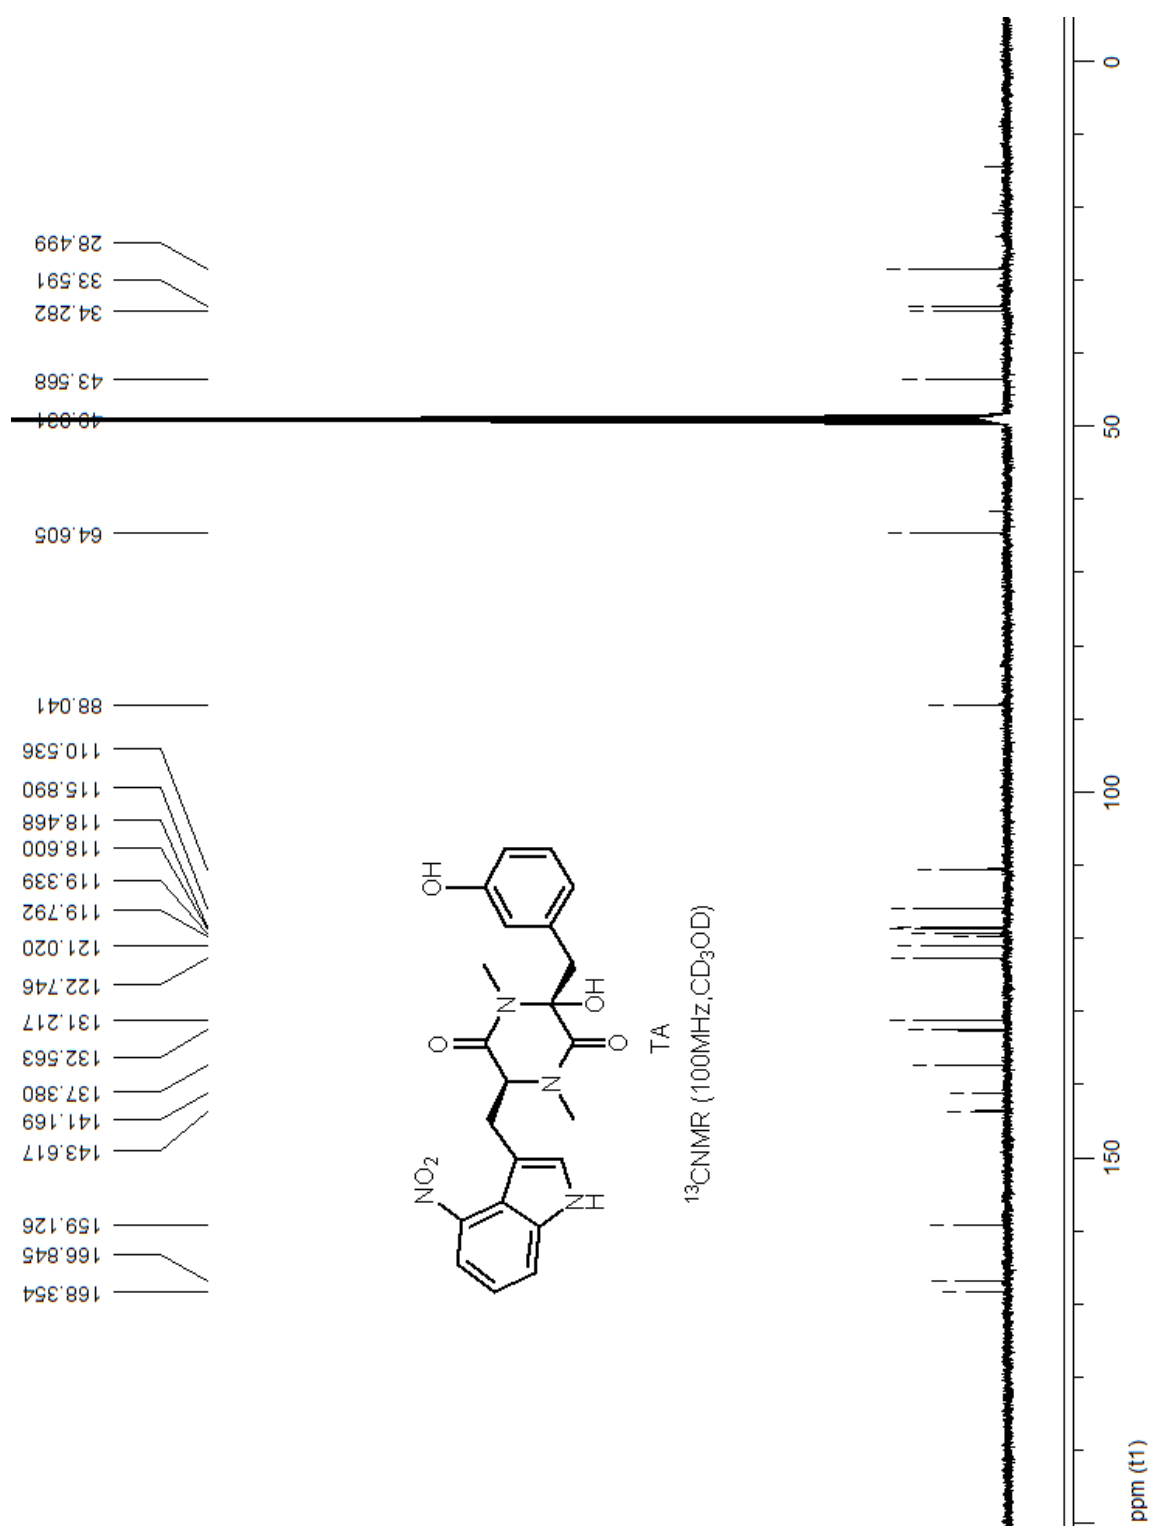

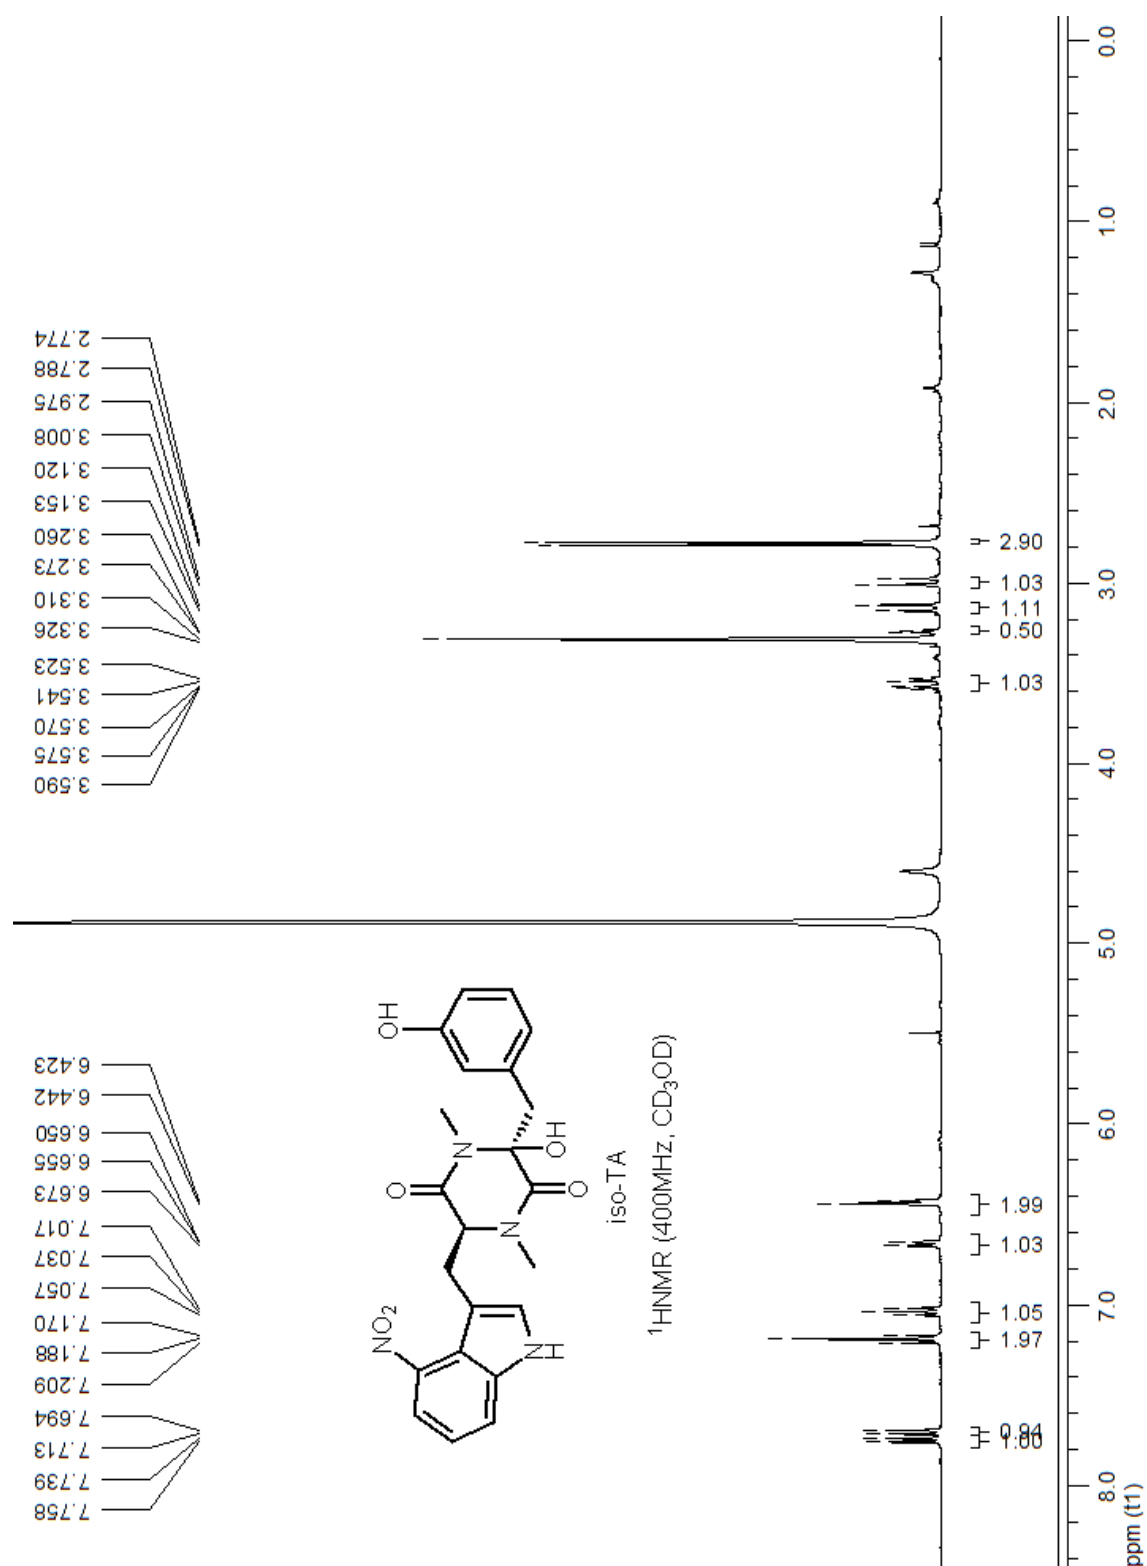

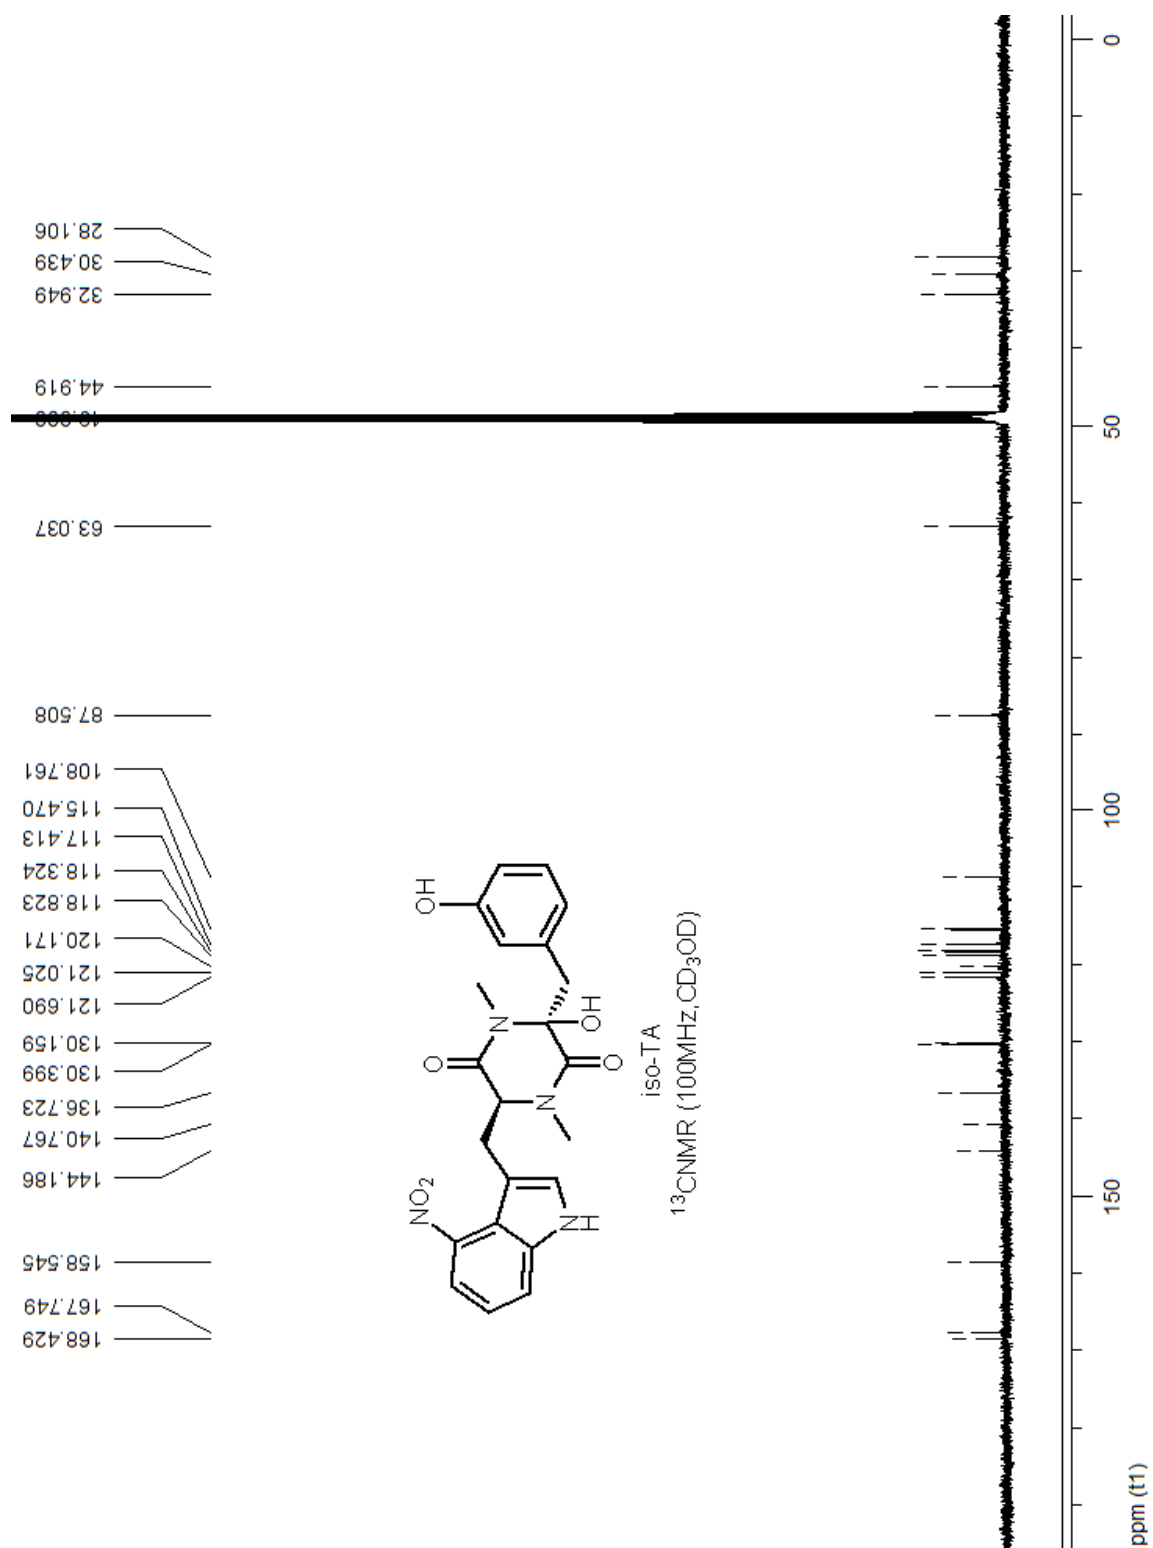

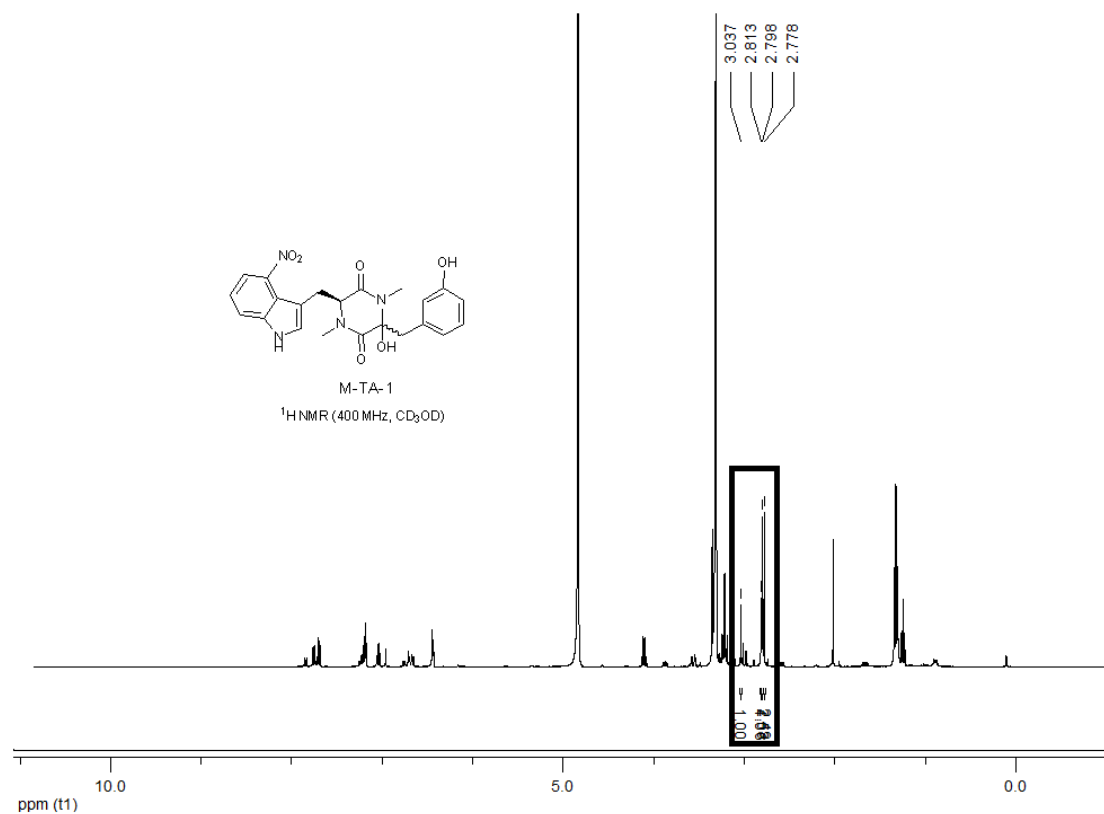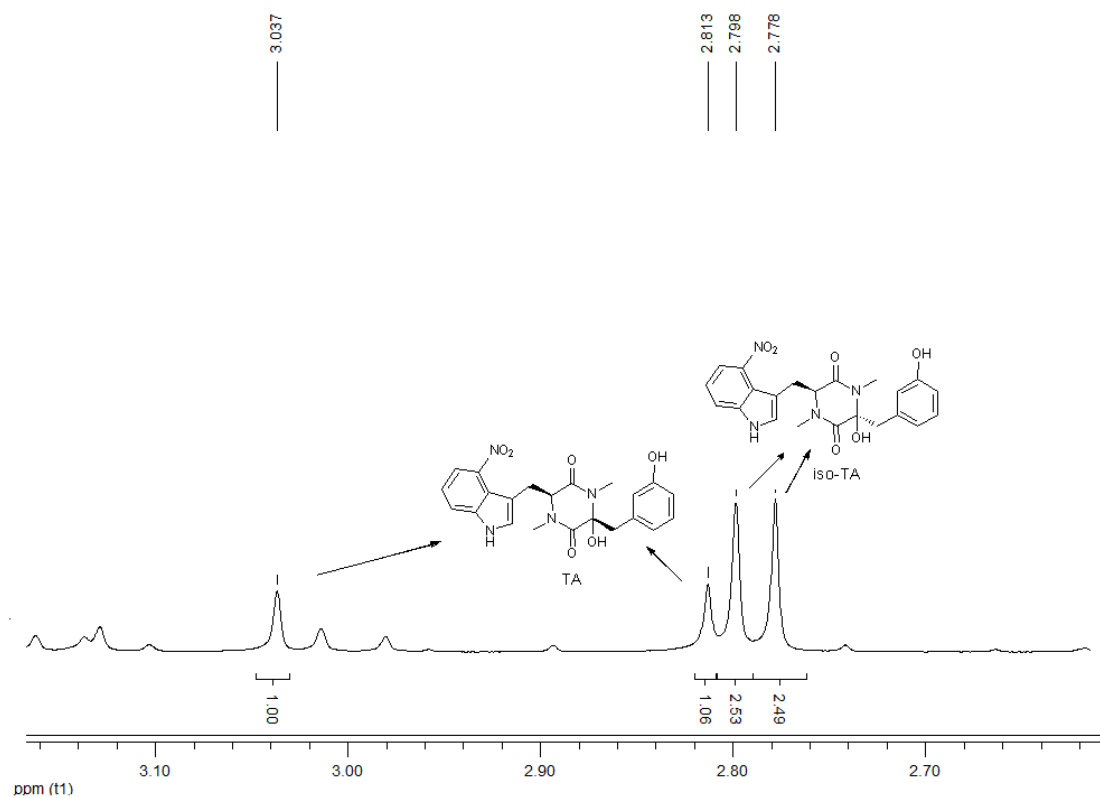



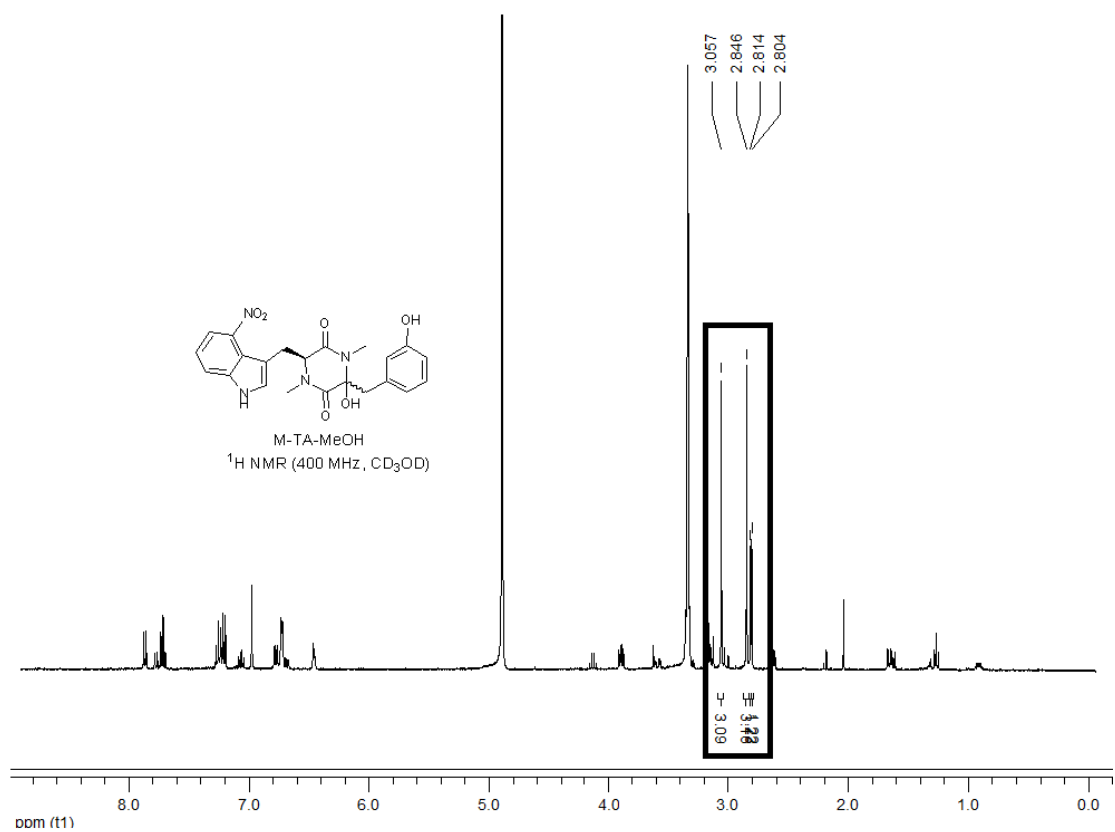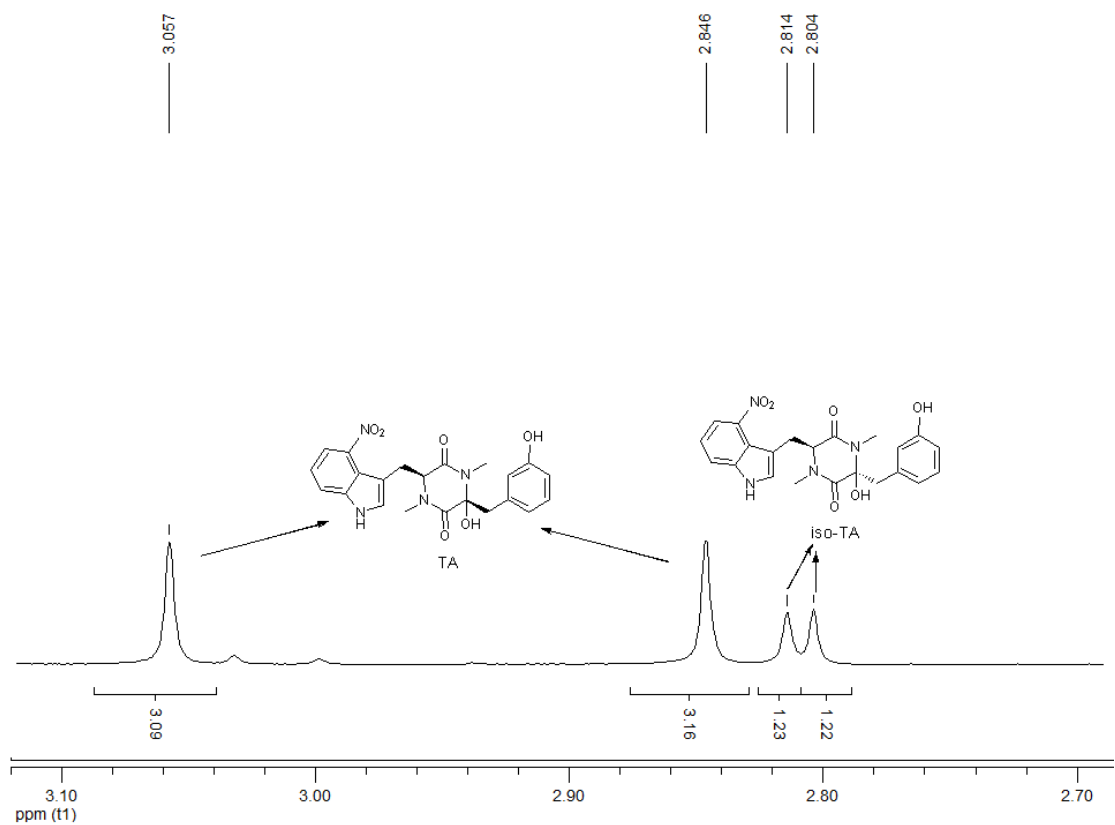

## Part E

### X-Ray Crystallographic Data

Prism-like specimens of TA and iso-TA were prepared from mixture of methanol and diethyl ether. The X-ray intensity data were measured on a Rigaku 007 saturn 70.

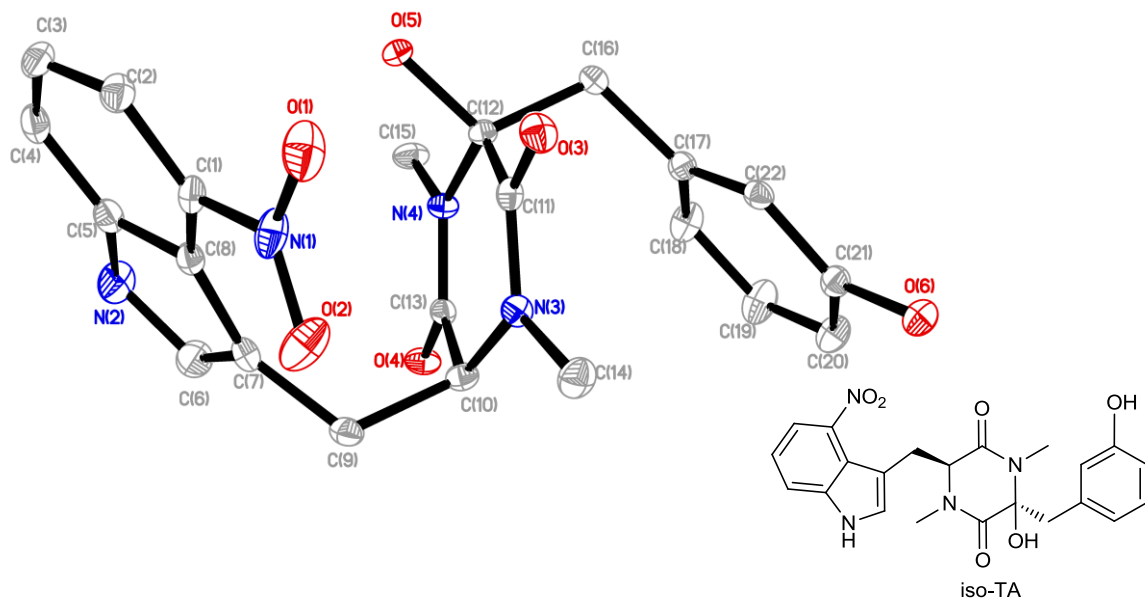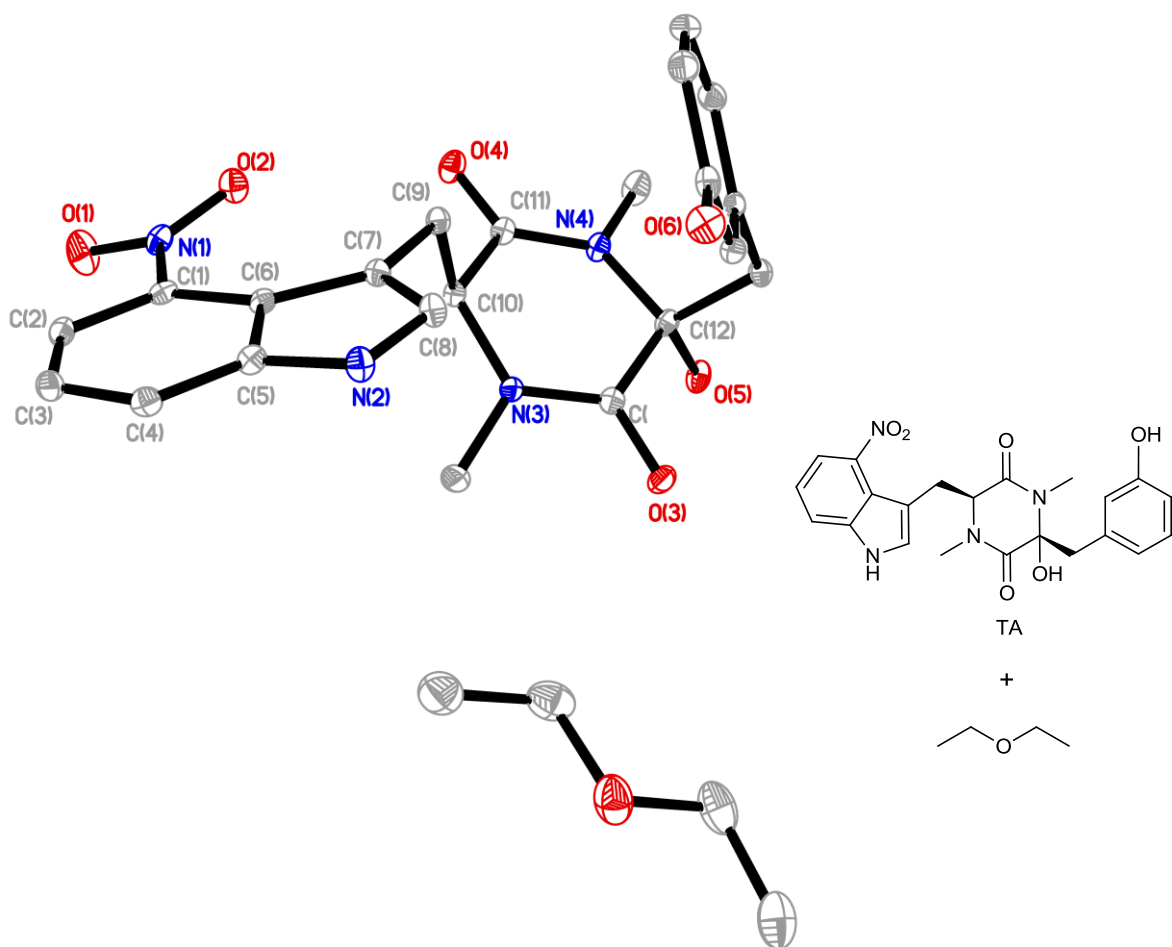

| Items                                       | iso-TA                                                          | TA                                                                |
|---------------------------------------------|-----------------------------------------------------------------|-------------------------------------------------------------------|
| CCDC deposition number                      | 943364                                                          | 943363                                                            |
| Empirical formula                           | C <sub>22</sub> H <sub>22</sub> N <sub>4</sub> O <sub>6</sub>   | C <sub>26</sub> H <sub>21</sub> N <sub>4</sub> O <sub>7</sub>     |
| Formula weight                              | 438.44                                                          | 511.55                                                            |
| Temperature [K]                             | 113(2)                                                          | 113(2)                                                            |
| Wavelength [Å]                              | 0.71073                                                         | 0.71073                                                           |
| Crystal system, Space group                 | Monoclinic, C2                                                  | Triclinic, P-1                                                    |
| <i>a</i> [Å]                                | 14.897(3)                                                       | 8.057(3)                                                          |
| <i>b</i> [Å]                                | 6.8317(14)                                                      | 9.258(3)                                                          |
| <i>c</i> [Å]                                | 20.380(4)                                                       | 17.387(5)                                                         |
| $\alpha$ [°]                                | 90                                                              | 80.687(10)                                                        |
| $\beta$ [°]                                 | 102.13(3)                                                       | 79.096(11)                                                        |
| $\gamma$ [°]                                | 90                                                              | 87.104(13)                                                        |
| <i>V</i> [Å <sup>3</sup> ]                  | 2027.8(7)                                                       | 1256.5(7)                                                         |
| <i>Z</i>                                    | 4                                                               | 2                                                                 |
| Calculated density [g/cm <sup>3</sup> ]     | 1.436                                                           | 1.352                                                             |
| Absorption coefficient [mm <sup>-1</sup> ]  | 0.107                                                           | 0.099                                                             |
| Crystal size [mm]                           | 0.20 x 0.18 x 0.12                                              | 0.20 x 0.18 x 0.12                                                |
| $\theta$ range [°]                          | 2.77 to 26.01                                                   | 2.23 to 27.95                                                     |
| Limiting indices                            | -18 ≤ <i>h</i> ≤ 17<br>-8 ≤ <i>k</i> ≤ 8<br>-24 ≤ <i>l</i> ≤ 25 | -10 ≤ <i>h</i> ≤ 10<br>-12 ≤ <i>k</i> ≤ 12<br>-22 ≤ <i>l</i> ≤ 22 |
| Reflections collected / unique              | 8786 / 3887                                                     | 15845 / 5974                                                      |
| Max. and min. transmission                  | 0.9873 and 0.9790                                               | 0.9882 and 0.9804                                                 |
| Refinement method                           | on <i>F</i> <sup>2</sup>                                        | on <i>F</i> <sup>2</sup>                                          |
| Parameters                                  | 297                                                             | 340                                                               |
| Goodness of fit                             | 0.975                                                           | 1.050                                                             |
| <i>R</i> 1 indices (obsd data)              | 0.0483                                                          | 0.0436                                                            |
| <i>wR</i> 2 indices (obsd data)             | 0.1041                                                          | 0.1183                                                            |
| Largest diff peak/hole [e Å <sup>-3</sup> ] | 0.203/-0.297                                                    | 0.637 /-0.375                                                     |
